# 1 **Exploring the interaction network of a synthetic gut bacterial** 2 **community**

3  
4 Anna S. Weiss <sup>1</sup>, Anna G. Burrichter <sup>1\*</sup>, Abilash Chakravarthy Durai Raj <sup>1\*</sup>, Alexandra von  
5 Stempel <sup>1</sup>, Chen Meng <sup>2</sup>, Karin Kleigrewe <sup>2</sup>, Philipp C. Münch <sup>1,3</sup>, Luis Rössler <sup>4</sup>, Claudia  
6 Huber <sup>4</sup>, Wolfgang Eisenreich <sup>4</sup>, Lara M. Jochum <sup>5</sup>, Stephanie Göing <sup>6</sup>, Kirsten Jung <sup>6</sup>, Alvaro  
7 Sanchez <sup>7,8</sup>, Bärbel Stecher <sup>1,9</sup>

8  
9 \*These authors contributed equally to this work.

10  
11 <sup>1</sup> Max von Pettenkofer Institute of Hygiene and Medical Microbiology, Faculty of Medicine,  
12 LMU Munich, Germany

13 <sup>2</sup> Bavarian Center for Biomolecular Mass Spectrometry, TU Munich, Freising, Germany

14 <sup>3</sup> Department for Computational Biology of Infection Research, Helmholtz Center for  
15 Infection Research, Brunswick, Germany

16 <sup>4</sup> Department of Chemistry, Bavarian NMR Center – Structural Membrane Biochemistry, TU  
17 Munich, Garching, Germany

18 <sup>5</sup> Ramboll Deutschland GmbH, Munich, Germany

19 <sup>6</sup> Department of Microbiology, LMU, Martinsried, Germany

20 <sup>7</sup> Department of Ecology & Evolutionary Biology, Yale University, New Haven, CT, USA

21 <sup>8</sup> Microbial Sciences Institute, Yale University, West Haven, CT, USA

22 <sup>9</sup> German Center for Infection Research (DZIF), partner site LMU Munich, Germany

## 23 **Key Words**

24 Metabolic network, minimal consortium, syncom, cross-feeding, microbial community  
25 dynamics, sDMDMm2, Oligo-MM, Muribaculum, Akkermansia,

26

## 27 **Abstract**

28 A key challenge in microbiome research is to predict functionality from microbial community  
29 composition. As central microbiota functions are determined by bacterial community networks  
30 it is important to gain insight into the principles that govern bacteria-bacteria interactions. Here,  
31 we focused on growth and metabolic interactions of the Oligo-Mouse-Microbiota (OMM<sup>12</sup>)  
32 synthetic bacterial community, which is increasingly used as model system in gut microbiome  
33 research. Using a bottom-up approach, we uncovered the directionality of strain-strain  
34 interactions in mono- and pairwise co-culture experiments, as well as in community batch  
35 culture. Metabolomics analysis of spent culture supernatant of individual strains in  
36 combination with genome-informed pathway reconstruction provided insights into the  
37 metabolic potential of the individual community members. Thereby, we could show that the  
38 OMM<sup>12</sup> interaction network is shaped by both, exploitative and interference competition *in*  
39 *vitro*. In particular, *Enterococcus faecalis* KBI was identified as important driver of  
40 community composition by affecting the abundance of several other consortium members.  
41 Together, this study gives fundamental insight into key drivers and mechanistic basis of the  
42 OMM<sup>12</sup> interaction network, which serves as knowledge base for future mechanistic studies.

43

## 44 **Introduction**

45

46 The mammalian gastrointestinal tract harbors hundreds of bacterial species that occupy distinct  
47 ecological niches (1, 2). Diversity and stable coexistence of community members after initial  
48 assembly result in exclusion of invaders (3, 4). Community assembly and stability are  
49 inherently driven by commensal or cooperative trophic interactions, in which metabolic by- or  
50 end products of one species are the resource for another one (5-7). At the same time, bacteria  
51 compete for substrates by employing diverse predatory mechanisms, like the production of  
52 bacteriocins (8). These interaction patterns form complex ecological networks and determine  
53 community-level functions of the microbiota including dietary breakdown, metabolite  
54 production and colonization resistance (9-11). Consequently, disruption of bacterial networks  
55 by antibiotics, disease or diet-mediated interventions results in impairment of community-level  
56 functions (12, 13). To be able to predict, preserve and manipulate microbial community  
57 function, it is important to identify functionally important members and understand relevant  
58 interaction mechanisms between individual bacteria.

59 A multitude of different approaches have been used to characterize ecological networks of  
60 microbial communities. Function-related patterns in native microbial communities can be  
61 identified by systems biology approaches, combining metagenomics, metatranscriptomics and  
62 metabolomics analyses (14). Together with stable-isotope probing methodologies  
63 microorganisms with specific metabolic properties can be identified (15). Potentially  
64 interacting species may be predicted from co-occurrence analysis supported by genome guided

65 metabolic modeling (16-18). To experimentally verify the key ecological, structural and  
66 functional role of certain species in community structure and function, synthetic microbial  
67 consortia provide several advantages over native communities. As they are well-characterized,  
68 scalable and experimentally tractable, these systems are increasingly used to gain a mechanistic  
69 understanding of gut microbial ecology (19-22).

70 The Oligo-Mouse-Microbiota (OMM<sup>12</sup>) is a synthetic bacterial community, which stably  
71 colonizes mice and provides colonization resistance against enteropathogen infection (23-26).  
72 The OMM<sup>12</sup> comprises twelve bacterial species (*Enterococcus faecalis* KB1,  
73 *Limosilactobacillus reuteri* I49, *Bifidobacterium animalis* YL2, *Clostridium innocuum* I46,  
74 *Blautia coccoides* YL58, *Enterocloster clostridioformis* YL32, *Flavonifractor plautii* YL31,  
75 *Acutalibacter muris* KB18, *Bacteroides caecimuris* I48, *Muribaculum intestinale* YL27,  
76 *Akkermansia muciniphila* YL44 and *Turicimonas muris* YL45), representing the five major  
77 eubacterial phyla in the murine gastrointestinal tract (27) (**Fig. 1A**). The model is freely  
78 available for non-commercial use (28), and is therefore increasingly employed in preclinical  
79 microbiome research (29-32). So far little is known about the system's ecology and metabolic  
80 capabilities, both of which are factors that determine assembly, population dynamics and  
81 bacterial community functionality. Therefore, we aimed for a comprehensive exploration of  
82 the metabolic potential (i.e., substrates, metabolism and end products) and interactions between  
83 individual members of the OMM<sup>12</sup> consortium. We employed a bottom-up approach  
84 connecting outcomes of mono- and pairwise co-culture experiments with observations from  
85 complex communities in *in vitro* batch culture. Furthermore, we combined metabolomics  
86 analysis of spent culture supernatants with genome-informed pathway reconstruction and  
87 generated draft metabolic models of the OMM<sup>12</sup> consortium. Overall, we find that the majority  
88 of *in vitro* strain-strain interactions is amensalistic or competitive. In accordance, bacteriocin  
89 production and substrate overlap between the individual strains was correlated with negative  
90 strain-strain interaction *in vitro*, revealing potentially underlying mechanisms. Together, this  
91 work identified key interaction patterns among OMM<sup>12</sup> strains relevant in community  
92 assembly and functionality.

93

## 94 **Results**

### 95 **Probing directional interactions of OMM<sup>12</sup> strains using spent culture media**

96 To characterize directional interactions of the OMM<sup>12</sup> consortium members, we chose an *in*  
97 *vitro* approach to explore how the bacterial strains alter their chemical environment by growth  
98 to late stationary phase.

99 Growth of the individual monocultures in a rich culture medium (AF medium, Methods, **Tab.**  
100 **S1, Tab. S2**) was monitored over time (**Fig. S1**) and growth rates (**Tab. S3**) were determined.  
101 Strains were grouped by growth rate (GR) into fast growing strains (GR > 1.5 h<sup>-1</sup>, *E. faecalis*  
102 KB1, *B. animalis* YL2, *C. innocuum* I46 and *B. coccoides* YL58), strains with intermediate  
103 growth rate (GR > 1 h<sup>-1</sup>, *M. intestinale* YL27, *F. plautii* YL31, *E. clostridioformis* YL32, *B.*  
104 *caecimuris* I48 and *L.reuteri* I49) and slow growing strains (GR < 1 h<sup>-1</sup>, *A. muris* KB18, *A.*  
105 *muciniphila* YL44 and *T. muris* YL45). All strains reached late stationary phase within 20 h of  
106 growth. To probe overlap in substrate requirements and interactions between the individual  
107 OMM<sup>12</sup> members mediated by waste products or bacteriocins, sterile spent culture medium  
108 (SM) after growth to late stationary phase of all strains was obtained. Each OMM<sup>12</sup> strain was

109 cultured in the SM of the other community members and their own SM and growth rate, the  
110 area under the growth curve (AUC) and the pH were determined (**Fig. 1B, Fig. S2**).

111 A normalized inhibition factor ( $d_{AUC}$ ) was determined by the AUC in SM relative to the AUC  
112 in fresh AF medium ( $d_{AUC} = \frac{AUC_{SM} - AUC_{AF}}{AUC_{AF}}$ ) to quantify the influence of the different SM on the  
113 growth of the individual OMM<sup>12</sup> strains (**Fig. 1C**). Ten of the twelve SM were found to strongly  
114 decrease ( $d_{AUC} < -0.5$ ) the growth of at least one other strain of the consortium. Only the SM  
115 of strains *A. muris* KB18 and *A. muciniphila* YL44 were found to strongly inhibit growth of  
116 just the strains themselves. Corresponding to decreased AUC values in SM, growth rates were  
117 found to be lower as well, resulting in linear correlation of AUC and growth rates (**Fig. S3, R**  
118  $> 0.5$ ,  $p < 0.05$  for all strains). The SM of four strains, *E. faecalis* KB1, *B. coccoides* YL58, *E.*  
119 *clostridioformis* YL32 and *B. caecimuris* I48, were found to strongly inhibit ( $d_{AUC} < -0.5$ ) the  
120 growth of nine other strains each (**Fig. 1C**). Notably, growth of *E. faecalis* KB1 itself was only  
121 strongly reduced in its own SM, while it was able to grow in other strains' SM. *T. muris* YL45  
122 was the only strain not showing clear growth inhibition in any of the SM while its SM strongly  
123 decreased growth ( $d_{AUC} < -0.5$ ) of three other strains, *A. muris* KB18, *M. intestinale* YL27 and  
124 *F. plautii* YL31.

### 125 **Individual pH profiles as indicators for niche modification**

126 The pH of the culture medium after growth to stationary phase can be used as a measure for  
127 the extent of strain specific environmental modification (11) and may partly explain inhibition  
128 of bacterial growth in a SM. Therefore, we determined the pH of the individual SM before and  
129 after (double spent media; DSM) growth of all OMM<sup>12</sup> strains (**Fig. 1B, Methods**). From these  
130 values, we defined the  $\Delta pH$  for every strain after growth in fresh medium ( $\Delta pH_{SM}$ ) and in all  
131 SM ( $\Delta pH_{DSM}$ ) by analyzing the strength (difference of pH values) and direction (more acidic  
132 or more alkaline) of the pH change (**Fig. 1D**). After growth in fresh AF medium with neutral  
133 pH of 7.0, the OMM<sup>12</sup> strains showed different degrees of  $\Delta pH_{SM}$ . While *E. faecalis* KB1, *B.*  
134 *animalis* YL2, *M. intestinale* YL27, *B. caecimuris* I48 and *B. coccoides* YL58 distinctly  
135 acidified the medium ( $pH_{SM} < 6.2$ ), the growth of the other strains resulted in either slightly  
136 more alkaline or nearly neutral medium. Correlating inhibition of growth in a SM ( $d_{AUC}$ ) with  
137 the mean pH of the individual SM for each strain revealed that growth inhibition did not directly  
138 correlate with the pH. Only strains *B. animalis* YL2, *A. muciniphila* YL44 and *B. caecimuris*  
139 I48 showed a significant negative correlation ( $R < -0.5$ ,  $p < 0.05$ ) between growth inhibition  
140 and pH (**Fig. S4**) with stronger inhibition in more acidic pH ranges.

141 Most interestingly, many strains did not show the same magnitude or direction of alteration in  
142 pH when grown in SM of another strain ( $\Delta pH_{DSM}$ ) compared to growth in fresh culture medium  
143 ( $\Delta pH_{SM}$ ). This indicates an altered metabolic behavior of some strains in specific SM  
144 environments that differs from metabolic behavior in fresh AF medium (**Fig. S5, Supplemental**  
145 **Text A**).

### 146 **Production of antibacterial compounds by *E. faecalis* KB1**

147 Growth inhibition in SM (**Fig. 1C**) can further be explained by the production of antimicrobial  
148 compounds. To test the production of antimicrobial compounds by the OMM<sup>12</sup> strains, we used  
149 a phenotyping approach and performed spot assays on agar plates (**Fig. 1E**). Inhibition zones  
150 were only seen in case of *E. faecalis* KB1, which produced one or several compounds active  
151 against *B. animalis* YL2, *F. plautii* YL31, *E. clostridioformis* YL32, *C. innocuum* I46 and *L.*  
152 *reuteri* I49. Genome analysis revealed that the strain encodes genes for the production of  
153 several bacteriocins (Supplemental Text B), including enterocin L50, an enterococcal  
154 leaderless bacteriocin with broad target range among Gram-positive bacteria (33). All other  
155 strain pairs did not show signs of growth inhibition by compound excretion under these

156 conditions, despite the presence of genes for lanthibiotic production in the genome of *B.*  
157 *coccoides* YL58 (determined by antiSMASH) (34). Although expression of antimicrobial  
158 molecules may be induced by specific environmental triggers which are absent in the  
159 monoculture *in vitro* setting, we concluded that interference competition may only play a role  
160 in a subset of pair-wise interactions in AF medium involving *E. faecalis* KB1.

### 161 **Substrate depletion profiles correlate with growth inhibition in SM**

162 As pH and antimicrobial compounds only partly explained inhibition of growth in SM, we set  
163 out to gain more insights into the individual metabolic profiles in our *in vitro* setting. Therefore,  
164 triplicate samples of fresh AF medium and SM were analyzed by a mass spectrometry-based  
165 untargeted metabolomics approach (TripleTOF, Methods). Combining positive and negative  
166 ionization mode, 3092 metabolomic features were detected in total (Methods). From these,  
167 2387 (77.20 %) were significantly altered (t-test, p value < 0.05) by at least one of the twelve  
168 strains (**Fig. S6**). Hierarchical clustering of the metabolomic feature depletion profiles (i.e.  
169 substrates used by the bacteria; **Fig. 2A**) reflects the phylogenetic relationship between the  
170 strains (**Fig. 1A**). Correlating the phylogenetic distance between the individual strains with the  
171 number of shared depleted metabolomic features in AF medium (**Fig. S7**) showed that  
172 phylogenetically similar strains of the consortium have a higher substrate overlap than  
173 phylogenetically distant strains ( $R = -0.29$ ,  $p = 0.017$ ). The total number of metabolomic  
174 features that are depleted from AF medium greatly varies for the different strains, ranging from  
175 over 600 depleted features for *M. intestinale* YL27 to only 42 for *A. muciniphila* YL44 (**Fig.**  
176 **2B**). The strain specific profiles of depleted metabolomic features were compared pairwise and  
177 the number of overlapping features was determined (**Fig. 2C**). Phylogenetically related strains  
178 like *E. clostridioformis* YL32 and *B. coccoides* YL58 or *M. intestinale* YL27 and *B. caecimuris*  
179 I48 share over 50% of depleted metabolic features each, suggesting a strong substrate overlap  
180 in AF medium. Visualizing the extend of overlap between substrate depletion profiles reveals  
181 that Bacteroidales, Clostridia and Bacilli strains of the consortium dominate with the highest  
182 number of commonly depleted substrates in AF medium (**Fig. 2D**).

183 Correlating the growth inhibition in SM ( $d_{AUC}$ ) with the pairwise overlap in depletion profiles  
184 (**Fig. 2C**) revealed that a larger overlap is correlated with a stronger growth inhibition in the  
185 corresponding SM ( $R = -0.46$ ,  $p = 3.1E-08$ , **Fig. S8**). This is illustrated by *A. muciniphila*  
186 YL44, which used only a low numbers of substrates from the AF medium (**Fig. 2B**) and the  
187 SM of which had only little effect on the growth of the other strains of the consortium (**Fig.**  
188 **1C**). On the other hand, the strain's growth itself was strongly reduced in the SM of most other  
189 consortium members (**Fig. 1C**, **Fig. S2**), which depleted a large spectrum of metabolomic  
190 features including those used by *A. muciniphila* YL44 (**Fig. 2C**).

### 191 **Genome-informed metabolic potential of the OMM<sup>12</sup> consortium**

192 To be able to infer metabolic interactions between the individual consortium members, a  
193 reference dataset giving insight into the metabolic potential of the OMM<sup>12</sup> based on genetic  
194 information was generated. We screened the genomes of the twelve strains for key enzymes of  
195 central carbon metabolism (e.g., fermentation pathways, respiration and amino acid  
196 metabolism) (**Fig. 3A**), as well as for transporters (ABC-transporters and PTS-systems) for  
197 carbohydrates and amino acids (**Fig. S9, SI data table**). Hierarchical clustering of the genome-  
198 informed metabolic potential (**Fig. 3A**) reflected phylogenetic relationships in several  
199 instances, e.g., the Lachnospirales strains of the consortium *E. clostridioformis* YL32 and *B.*  
200 *coccoides* YL58, as well as the Oscillospirales strains *F. plautii* YL31 and *A. muris* KB18 were  
201 found to cluster closely together. Of note, the metabolic potential of *T. muris* YL45  
202 (Sutterellaceae) was very distinct, clustering differently from all other strains. Generally, high  
203 diversity of central and fermentation pathways was found among the consortium members.

204 Moreover, enzymes for the degradation of monosaccharides (e.g., arabinose, xylose and ribose)  
205 and amino acids (e.g., methionine and glutamine) are highly prevalent among consortium  
206 members. Phosphotransferase systems were especially prevalent among strains *E. faecalis*  
207 KB1, *E. clostridioformis* YL32 and *C. innocuum* I46, while ABC transporters for  
208 carbohydrates and amino acids were more distributed among all consortium members (**Fig.**  
209 **S9**).

210

### 211 **Metabolite production and fermentation pathways of the OMM<sup>12</sup> strains in AF medium**

212 To gain insights into the metabolites and fermentation products produced and consumed by the  
213 individual strains of the consortium in the given *in vitro* conditions, SM were analyzed using  
214 different mass spectrometry approaches (Methods, **Fig. S10**, **Fig. S11**). Combining  
215 experimentally obtained insights with genome-based information on the presence of key  
216 enzymes enabled the generation of broad-scale draft metabolic models of the individual  
217 OMM<sup>12</sup> community members (**Fig. 3B-E**, **Fig. S12**, Supplemental Text C).

218 To confirm that fermentation pathways identified by genomics were active under *in vitro*  
219 conditions, short chain fatty acid (SCFA) production and consumption was analyzed (**Fig.**  
220 **S10A**). As observed for the SM metabolic profiles (**Fig. S6**), hierarchical clustering revealed  
221 that closely related bacteria showed similar SCFA production and consumption profiles. Both  
222 Bacteroidetes strains produced acetic acid, succinic acid as well as branched-chain fatty acids.  
223 Both Lachnospiraceae strains generated high amounts of acetic acid. Butyric acid is produced  
224 by strains *F. plautii* YL31 and *C. innocuum* I46, the latter also being the only strain of the  
225 consortium excreting valeric acid and hexanoic acid. Of note, *F. plautii* YL31 also consumed  
226 lysine, indicating the ability to produce butyric acid from lysine, which was supported by the  
227 presence of gene coding for lysine aminomutase (EC 5.4.3.2 and EC 5.4.3.3) as well as two of  
228 the following genes encoding key enzymes in the pathway: L-erythro-3,5-diaminohexanoate  
229 dehydrogenase (EC 1.4.1.11) and 3-keto-5-aminohexanoate cleavage enzyme (EC 2.3.1.247).

230 Formic acid was produced by several strains and consumed by *T. muris* YL45 and *B. coccooides*  
231 YL58, indicating the ability of formic acid/ H<sub>2</sub> oxidation. *T. muris* YL45 and *B. coccooides*  
232 YL58 both encode genes for a CO dehydrogenase/acetyl-CoA-synthase (EC 1.2.7.4 and EC  
233 2.3.1.169), the key enzyme of the Wood-Ljungdahl pathway (reductive acetyl-CoA pathway).  
234 Formic acid can be processed via this pathway to acetyl-CoA. As another prominent example  
235 of bacterial fermentation, lactate production was confirmed (**Fig. S10B**) for *E. faecalis* KB1,  
236 *B. animalis* YL2, *F. plautii* YL31, *A. muris* YL45, *C. innocuum* I46 and *B. caecimuris*, all of  
237 which harbor genes coding for the enzyme lactate dehydrogenase (EC 1.1.1.27 and EC  
238 1.1.1.28).

239 By quantifying amino acid levels we could show that Bacteroidetes and Lachnospiraceae  
240 strains exhibited similar amino acid depletion and production profiles. In SM of strains *M.*  
241 *intestinale* YL27 and *B. caecimuris* I48, elevated levels of a diverse range of amino acids  
242 including glutamic acid, histidine, methionine, proline and phenylalanine were detected.  
243 Lachnospiraceae strains showed increased levels of isoleucine, tryptophan and valine, while  
244 alanine was especially depleted by *B. coccooides* YL58. Other strains of the consortium showed  
245 specific depletion of single amino acids, e.g., *F. plautii* YL31 strongly depleted lysine and  
246 glutamic acid, while *E. faecalis* KB1 depleted serine.

### 247 **Growth of OMM<sup>12</sup> strains in pairwise co-culture**

248 Next, we performed a set of experiments to characterize strain-strain interactions in the  
249 dynamic community-dependent context. We first analyzed direct competition of all strains in  
250 pair-wise co-cultures over the course of 72h, with serial dilutions every 24h. While growth was

251 monitored continuously by OD 600nm, samples for pH measurements and qPCR analysis were  
252 taken every 24h. The growth curves of most co-cultures, as well as supernatant pH differed  
253 from the corresponding strain specific characteristics observed in monoculture (**Fig. S13, Fig.**  
254 **4A**). These differences reflect co-culture dynamics, as can be seen from change in relative  
255 abundances over time (**Fig. 4B, C**).

256 To identify directionality and mode of interaction between the OMM<sup>12</sup> strains, we analyzed the  
257 relative changes in absolute abundance (16S rRNA gene copies) as a measure of how  
258 successful a strain can grow in co-culture relative to monoculture after 72h. The mean absolute  
259 abundance ratio was calculated for every strain in all pairwise co-cultures ( $r_{i,bm} = \frac{m_{i,co}(t72h)}{m_{i,mono}(t72h)}$ )  
260 (**Fig. S14, Methods**). If absolute abundance of a strain increased significantly in co-culture  
261 relative to monoculture ( $r_{bm} > 1$ ), the interaction was categorized as positive (+), if it decreased  
262 ( $r_{bm} < 1$ ) the interaction was categorized as negative (-) (t-test comparing the  $r_{bm}$  of three  
263 independent experiments, **Fig. S15**). If it did not significantly ( $p > 0.05$ ) differ from that in  
264 monoculture ( $r_{bm} = 1$ ), the interaction was categorized as neutral (0). By this, we created a co-  
265 culture interaction matrix (**Fig. 5A**): the vast majority of the interactions was classified as  
266 amensalistic (0/- and -/0, 46 of 66 of interactions). A smaller subset of interactions was either  
267 competitive (-/-, 7 of 66 of interactions) or neutral (0/0, 11 of 66 of interactions). No mutualistic  
268 interactions (+/+) were observed. However, one example for each, commensalism (0/+ and  
269 +/0) and predation (+/- and -/+), were identified.

270 The extent to which the individual strains altered the growth of other community members in  
271 the co-culture differed distinctly. While *E. faecalis* KB1 and *C. innocuum* I46 lead to nine  
272 negative co-culture outcomes each, *A. muciniphila* YL44 and *A. muris* KB18 only impaired  
273 growth of one and zero strains, respectively. Simultaneously, both strains are negatively  
274 influenced in most co-cultures, with a significantly decreased absolute abundance in ten and  
275 eight co-cultures, respectively. Notably, *B. coccoides* YL58 is involved in five of seven  
276 competitive interactions of the consortium. These observations are in line with the outcomes  
277 observed in SM experiments, as strongly negative co-culture outcome correspond to a strong  
278 inhibition of a strain in the respective SM (**Fig. S16**).

### 279 **Community structure of the OMM<sup>12</sup> consortium**

280 Next, we set out to investigate if interactions found in co-cultures are transferrable to the  
281 strains' behavior in the complete OMM<sup>12</sup> community. To this end, all twelve OMM strains  
282 were simultaneously co-cultured in AF medium and were serially diluted 1:100 every 24h into  
283 fresh AF medium. Relative abundance of all strains after 72h and 10 days compared to the  
284 inoculum was determined by qPCR for ten replicates each in two independent experiments  
285 from different inocula (**Fig. S17, Fig. S18, Fig. 5B**).

286 While each of the OMM<sup>12</sup> members except *E. faecalis* KB1 was outcompeted to a very low  
287 relative abundance in at least one pairwise culture (**Fig. 5A**), the majority (10 out of 12) of the  
288 consortium members were able to coexist in the complex community over the course of 72h  
289 (**Fig. S17A**) and up to 10 days. (**Fig. 5B, Fig. S17B**). Replicate communities showed  
290 reproducible community structure, even when different inocula were used (**Fig. 5B, Fig. S17B**)  
291 and especially when compared on the order and phylum level (**Fig. S18**). Communities were  
292 dominated by *B. coccoides* YL58 and *E. faecalis* KB1, together making up > 50% of the  
293 relative abundance, which corresponds to their dominant role in SM and co-culture experiments  
294 (**Fig. 1C, 5A**). While strains *B. animalis* YL2 and *L. reuteri* I49 were not detectable at 72h and  
295 10 days in all replicates, *A. muris* KB18 was found in only few of the communities at 10 days  
296 (relative abundance < 1%).

### 297 ***E. faecalis* KB1 strongly impacts overall community composition**

298 To understand how interactions observed on the pairwise level transfer to the community  
299 context, we derived pairwise correlations from the relative abundance data of all communities  
300 at day 10 derived from two independent experiments (**Fig. S19**). The strong negative influence  
301 of *E. faecalis* KB1 on most other strains observed in pairwise co-cultures applied in the  
302 community context as well. High relative abundance of *E. faecalis* KB1 linearly correlated  
303 with decreased relative abundance of *C. innocuum* I46 ( $R = -0.87$ ;  $p < 0.05$ ), supporting the  
304 hypothesis of a predatory interaction between *E. faecalis* KB1 and *C. innocuum* I46 as observed  
305 in co-culture experiments (**Fig. 5A, D**). In order to identify potentially cross-fed metabolites of  
306 *C. innocuum* I46 to *E. faecalis* KB1, we mined metabolomic data of SM for features enriched  
307 in *C. innocuum* I46 and depleted by *E. faecalis* KB1. Thereby, we identified several compounds  
308 including malate, L-methionine, spermidine and methylglyoxal (**Fig. 5E**). To experimentally  
309 support the idea of cross-feeding, we exemplarily tested uptake of  $^{14}\text{C}$ -malate into intact cells  
310 of *E. faecalis* KB1. To slow the metabolization of this metabolite, all assays were performed  
311 at  $18^\circ\text{C}$ . We found a very fast linear uptake of  $^{14}\text{C}$ -malate by *E. faecalis* KB1 within the first  
312 60 s, which could explain why malate utilization confers a growth advantage to this strain (**Fig.**  
313 **5F**).

314 Finally, we were interested in how the absence of *E. faecalis* KB1 would affect the overall  
315 community structure. We generated a ‘dropout’ community including all strains of the OMM<sup>12</sup>  
316 consortium except *E. faecalis* KB1 (OMM<sup>11</sup>-KB1). Compositional analysis revealed increased  
317 relative abundance of *C. innocuum* I46 and *B. animalis* YL2 in the OMM<sup>11</sup>-KB1 compared to  
318 the full OMM<sup>12</sup> community (**Fig. 5C**). In addition, the absolute abundances of strains *B.*  
319 *animalis* YL2, *C. innocuum* I46 and *B. caecimuris* I48 were found to increase significantly (t-  
320 test,  $p < 0.05$ ) in the absence of *E. faecalis* KB1 (**Fig. S20**). While the increase in abundance  
321 of *B. animalis* YL2 and *C. innocuum* I46 may be explained by absent enterocin production by  
322 *E. faecalis* KB1, the increased abundance of *B. caecimuris* I48 was unexpected. Further, the  
323 abundance of *F. plautii* YL31, *E. clostridioformis* YL32, *A. muciniphila* YL44 and *T. muris*  
324 YL45 was found to decrease in the absence of *E. faecalis* KB1. This indicates either direct  
325 positive effects of *E. faecalis* KB1 on these strains or indirect effects that occur through the  
326 overall shift in OMM<sup>11</sup>-KB1 community composition compared to the OMM<sup>12</sup> consortium.

327

## 328 Discussion

329 A central challenge in gut microbiome research is to understand how interactions between the  
330 individual microorganisms affect community-level structure and related functions. Bottom-up  
331 approaches involving synthetic communities are valuable tools to study these interactions, as  
332 they allow to reduce complexity and to enable strain-specific manipulation. Using an *in vitro*  
333 approach, we focused on characteristics and interactions of the OMM<sup>12</sup> community and  
334 combined monoculture, pairwise and community cultivation of the strains with genome and  
335 metabolomics analysis of their SM. Thereby we reveal that the OMM<sup>12</sup> community interaction  
336 network is shaped by exploitative and interference competition. In particular, *E. faecalis* KB1,  
337 a low-abundant member of the mammalian gut microbiota, was identified as important driver  
338 of *in vitro* community composition by directly or indirectly altering the abundance of several  
339 other consortium members. We provide draft metabolic models of the individual OMM<sup>12</sup>  
340 strains, which will be a valuable tool for mechanistic studies using this synthetic community.

341 Exploitative (i.e. substrate) competition plays a major role in shaping intestinal bacterial  
342 communities (35). Understanding the underlying principles of how bacteria compete for



343 available nutrients is essential to predict and control community composition. We found that  
344 phylogenetically similar strains showed a higher substrate overlap (**Fig. S7**), which is in  
345 accordance with previous studies demonstrating that phylogeny reflects metabolic capabilities  
346 of bacteria (36, 37). Furthermore, overlap in substrate depletion profiles was correlated with  
347 growth inhibition in the respective SM (**Fig. S8**). This clearly indicates strong exploitative  
348 competition between individual OMM<sup>12</sup> strains. In particular *B. caecimuris* I48, *E. faecalis*  
349 KB1, *E. clostridioforme* YL32 and *B. coccoides* YL58 were found to consume a high number  
350 of substrates (>200), while their SM inhibited growth of the majority of the other community  
351 members (**Fig. 1C**). Of note, *M. intestinale* YL27 and *C. innocuum* I46, also consumed over  
352 200 substrates each, but inhibited few other strains. This demonstrates that substrate overlap  
353 cannot simply predict inhibition in all cases and other mechanisms (i.e. waste product  
354 inhibition) play a role in specific cases.

355 Besides substrate competition, a strain's ability to acidify its environment or release an  
356 inhibitory factor (e.g. waste products, bacteriocins) can determine if another species can grow  
357 in the exhausted medium or not. Several strains, including *B. caecimuris* I48, *B. coccoides*  
358 YL58, *E. faecalis* KB1 and *C. innocuum* I46 acidified the medium during growth in  
359 monoculture. However, only for few species, *A. muciniphila* YL44, *B. caecimuris* I48 and *B.*  
360 *animalis* YL2, acidic pH correlated with reduced growth (**Fig. S4**). Moreover, the pH in the  
361 full OMM<sup>12</sup> community, where most of the strains coexisted, was also acidic (pH of 6.2),  
362 suggesting that pH modification does not play a major role in driving community composition  
363 *in vitro*. Interference competition by bacteriocins is widespread among gut bacterial  
364 communities (38). We found that *E. faecalis* KB1 produces at least one antimicrobial  
365 compound that shows activity against five of the Gram-positive OMM<sup>12</sup> strains (*B. animalis*  
366 YL2, *E. clostridioformis* YL32, *F. plautii* YL31, *C. innocuum* I46 and *L. reuterii* I49) (**Fig.**  
367 **1E**). *E. faecalis* harbors genes coding for at least two different enterocins (enterocin  
368 L50A/L50B and enterocin O16). Therefore, we hypothesize that some of the inhibitory effects  
369 of *E. faecalis* KB1 on those strains can be attributed to enterocin-mediated killing.

370 *E. faecalis* is a prevalent but low abundant member of the undisturbed human and animal  
371 microbiota. Following antibiotic therapy, the bacterium can dominate the gut and cause blood-  
372 stream infection in immunocompromised individuals (39). Understanding how *E. faecalis* out-  
373 competes/overgrows other gut microorganisms is important in order to intervene with *E.*  
374 *faecalis* domination in the gut. Besides enterocin-mediated killing we found that metabolite  
375 cross-feeding seems to contribute to the interaction of *E. faecalis* KB1 with *C. innocuum* I46  
376 (**Fig. 5D; Fig. S10**). Based on metabolic profile mining, we hypothesize, that *E. faecalis* KB1  
377 consumes malate, methionine, arginine and serine among other metabolites in co-culture with  
378 *C. innocuum* I46 (**Fig. 5E, Fig. S11**). Interestingly, a previous study (40) reported that glucose-  
379 malate co-metabolism increases growth of *E. faecalis* over glucose consumption alone. In  
380 connection with fast uptake rate of <sup>14</sup>C-malate by *E. faecalis* KB1 (**Fig. 5F**), this suggests that  
381 malate cross-feeding may also contribute to *E. faecalis* KB1 gain in absolute abundance in co-  
382 culture with *C. innocuum* I46.

383 Using batch culture experiments we were able to investigate assembly and dynamics of full  
384 OMM<sup>12</sup> and OMM<sup>11</sup>-KB1 dropout communities *in vitro*. A significant increase in *B. animalis*  
385 YL2 and *C. innocuum* I46 in the community lacking *E. faecalis* KB1 suggested that enterocin-  
386 mediated killing also shapes the more complex community (**Fig. S20**). Notably, in the full  
387 OMM<sup>12</sup> community, ten of the twelve strains co-existed over ten days. This was remarkable  
388 given the high number of negative pairwise interactions in SM and co-culture experiments.  
389 Differences between the behavior of strains in pairwise versus complex communities point at  
390 higher-order ecological interactions that emerge in the community context. As previously

391 shown in other studies, the underlying mechanisms may involve metabolic flexibility or mixed  
392 substrate utilization of the strains in the presence of competitors (41), metabolite cross-feeding  
393 and lack of waste-product inhibition and overall change in pH (11) or an excess of provided  
394 substrates in the medium.

395 Following up, it will be important to assess, if the *in vitro* findings can be translated to the  
396 mouse model. Several differences between *in vitro* and *in vivo* conditions were noted. While  
397 the *in vitro* community is dominated by *B. coccoides* YL58 and *E. faecalis* KB1, mouse  
398 communities are dominated by *B. caecimuris* I48 and *A. muciniphila* YL44 (**Fig. S21**)(26).  
399 Enrichment of amino acids and glucose in the used culture medium may favor growth of *B.*  
400 *coccoides* YL58 and *E. faecalis* KB1 *in vitro* at the expense of bacteria specialized on  
401 utilization of mucin and other complex carbohydrates (42, 43). To this end, it will be  
402 worthwhile to modify the *in vitro* conditions to more closely recapitulate the chemical  
403 landscape and spatial structure of the gut in future experiments.

404 Concluding, our study presents a comprehensive *in vitro* investigation of strain-strain  
405 interactions between members of a widely used synthetic intestinal bacterial community.  
406 Characterization of the metabolic profile of individual strains of the consortium as well as  
407 analyzing their metabolism and community assembly in co-culture revealed *E. faecalis* KB1  
408 and *B. coccoides* YL58 to be important drivers of community composition. Drawing on this  
409 detailed understanding of *in vitro* behavior, our results will enable to employ this model for  
410 mechanistic *in vivo* studies. This step-wise approach may ultimately allow accurate description  
411 of interaction dynamics of *in vivo* gut microbial communities and pave the way for targeted  
412 manipulation of the microbiome to promote human health. In particular, extending the  
413 approach of dropout communities lacking specific strains could help to elucidate the role of  
414 individual players in community functions like dietary breakdown, metabolite production and  
415 colonization resistance and to identify general principles of how bacterial interaction networks  
416 and the corresponding emergence of higher order interactions shape microbiome function. This  
417 will enable the design of therapeutic interventions to control microbial community functions  
418 by advanced microbiome engineering.

419

## 420 **Methods**

### 421 **Generation of a 16S gene based phylogenetic tree**

422 The genomes of the twelve strains of the OMM<sup>12</sup> consortium (27) were accessed via  
423 DDBJ/ENA/GenBank using the following accession numbers: CP022712.1, NHMR02000001-  
424 NHMR02000002, CP021422.1, CP021421.1, NHMQ01000001-NHMQ01000005,  
425 NHTR01000001-NHTR01000016, CP021420.1, NHMP01000001-NHMP01000020,  
426 CP022722.1, NHMU01000001-NHMU01000019, NHMT01000001-NHMT01000003,  
427 CP022713.1 and annotated using Prokka (default settings) (44). The 16S rRNA sequences of  
428 all strains were obtained. These rRNA FASTA sequences were uploaded to the SINA Aligner  
429 v1.2.11 (45) to align these sequences with minimum 95% identity against the SILVA database.  
430 By this, a phylogenetic tree based on RAxML (46), GTR Model and Gamma rate model for  
431 likelihood was reconstructed. Sequences with less than 90% identity were rejected. The  
432 obtained tree was rooted using *midpoint.root()* in the phytools package (47) in R and visualized  
433 using iTOL online (48).

434

### 435 **Genome annotation for predicting genome-informed metabolic potential**

436 The genomes (accessed via DDBJ/ENA/GenBank as stated above) of the twelve strains of the  
437 OMM<sup>12</sup> consortium were annotated using prodigal (version V2.6.3, default settings) (49) and  
438 KEGG orthologies (KO) for the protein-coding genes were obtained using the tool KOfamscan  
439 (default settings) (50). The tool provided multiple KO annotations for each gene with  
440 corresponding e-values and threshold scores. In order to get one KO annotation per gene, the  
441 annotation was considered only if a) the internal threshold score was reached (marked ‘\*’ by  
442 kofamscan) or b) an evalue of > 1e-03 was reached. The remaining annotations were ignored.

#### 443 **Strains and culture conditions**

444 Bacterial cultures were prepared from frozen monoculture stocks in a 10ml culture and  
445 subculture in cell culture flasks (flask T25, Sarstedt) previous to all experiments. Cultures were  
446 incubated at 37°C without shaking under strictly anaerobic conditions (gas atmosphere 7% H<sub>2</sub>,  
447 10% CO<sub>2</sub>, 83% N<sub>2</sub>). All experiments were carried out using AF medium (18 g.l<sup>-1</sup> brain-heart  
448 infusion, 15 g.l<sup>-1</sup> trypticase soy broth, 5 g.l<sup>-1</sup> yeast extract, 2.5 g.l<sup>-1</sup> K<sub>2</sub>HPO<sub>4</sub>, 1 mg.l<sup>-1</sup> haemin,  
449 0.5 g.l<sup>-1</sup> D-glucose, 0.5 mg.l<sup>-1</sup> menadione, 3% heat-inactivated fetal calf serum, 0.25 g.l<sup>-1</sup>  
450 cysteine- HCl·H<sub>2</sub>O). The following strains were used in this study: *Enterococcus faecalis* KB1  
451 (DSM32036), *Bifidobacterium animalis* YL2 (DSM26074), *Acutalibacter muris* KB18  
452 (DSM26090), *Muribaculum intestinale* YL27 (DSM28989), *Flavonifractor plautii* YL31  
453 (DSM26117), *Enterocloster clostridioformis* YL32 (DSM26114), *Akkermansia muciniphila*  
454 YL44 (DSM26127), *Turicimonas muris* YL45 (DSM26109), *Clostridium innocuum* I46  
455 (DSM26113), *Bacteroides caecimuris* I48 (DSM26085), *Limosilactobacillus reuteri* I49  
456 (DSM32035), *Blautia coccooides* YL58 (DSM26115).

#### 457 **Growth measurements**

458 Bacterial growth was measured in 96well round bottom plates (Nunc) using a GenTech Epoch2  
459 plate reader. Inocula were prepared from a previous culture and subculture and diluted in fresh  
460 AF medium to 0.01 OD<sub>600nm</sub>. Absorption at wavelength 600nm was determined in a reaction  
461 volume of 100 µl in monoculture and SM experiments and 150 µl in co-culture experiments.  
462 During continuous measurements, the plate was heated inside the reader to 37°C and a 30  
463 second double orbital shaking step was performed prior to every measurement.

#### 464 **Generation of spent culture media**

465 Bacterial cultures and subcultures were grown for 24 hours each in 10ml AF medium at 37°C  
466 under anaerobic conditions without shaking. Bacterial spent culture supernatants (SM) were  
467 generated by centrifugation of the densely grown subculture at 4°C for 20min at 5000xg and  
468 subsequent pH measurement and filter-sterilization (0.22 µm). SM samples were aliquoted and  
469 immediately frozen at -80°C. Samples were thawed under anaerobic conditions previous to  
470 growth measurements. Growth of all bacterial monocultures in the spent culture media (SM)  
471 of all respective other strains was then measured as described above. SM were inoculated with  
472 bacterial monocultures with starting OD<sub>600nm</sub> 0.01. After monoculture growth of 20h in the  
473 respective SM (resulting in double spent media, DSM), pH values were determined.

#### 474 **pH measurements**

475 pH measurements of bacterial supernatants were performed using a refillable, glass double  
476 junction electrode (Orion™ PerpHecT™ ROSS™, Thermo Scientific).

#### 477 **Metabolic profiling of late stationary phase bacterial supernatants**

478 The untargeted analysis was performed using a Nexera UHPLC system (Shimadzu) coupled to  
479 a Q-TOF mass spectrometer (TripleTOF 6600, AB Sciex). Separation of the spent media was  
480 performed using a UPLC BEH Amide 2.1x100, 1.7 µm analytic column (Waters Corp.) with  
481 400 µL/min flow rate. The mobile phase was 5 mM ammonium acetate in water (eluent A) and

482 5 mM ammonium acetate in acetonitrile/water (95/5, v/v) (eluent B). The gradient profile was  
483 100% B from 0 to 1.5 min, 60% B at 8 min and 20% B at 10 min to 11.5 min and 100% B at  
484 12 to 15 min. A volume of 5  $\mu$ L per sample was injected. The autosampler was cooled to 10°C  
485 and the column oven heated to 40°C. Every tenth run a quality control (QC) sample which was  
486 pooled from all samples was injected. The spent media samples were measured in a randomized  
487 order. The samples have been measured in Information Dependent Acquisition (IDA) mode.  
488 MS settings in the positive mode were as follows: Gas 1 55, Gas 2 65, Curtain gas 35,  
489 Temperature 500°C, Ion Spray Voltage 5500, declustering potential 80. The mass range of the  
490 TOF MS and MS/MS scans were 50 - 2000  $m/z$  and the collision energy was ramped from 15  
491 - 55 V. MS settings in the negative mode were as follows: Gas 1 55, Gas 2 65, Cur 35,  
492 Temperature 500°C, Ion Spray Voltage -4500, declustering potential -80. The mass range of  
493 the TOF MS and MS/MS scans were 50 - 2000  $m/z$  and the collision energy was ramped from  
494 -15 - -55 V.

495 The “msconvert” from ProteoWizard (51) were used to convert raw files to mzXML (de-noised  
496 by centroid peaks). The bioconductor/R package xcms (52) was used for data processing and  
497 feature identification. More specifically, the matched filter algorithm was used to identify  
498 peaks (full width at half maximum set to 7.5 seconds). Then the peaks were grouped into  
499 features using the "peak density" method (52). The area under the peaks was integrated to  
500 represent the abundance of features. The retention time was adjusted based on the peak groups  
501 presented in most of the samples. To annotate possible metabolites to identified features, the  
502 exact mass and MS2 fragmentation pattern of the measured features were compared to the  
503 records in HMDB (53) and the public MS/MS database in MSDIAl (54), referred to as MS1  
504 and MS2 annotation, respectively. The QC samples were used to control and remove the  
505 potential batch effect, t-test was used to compare the features' intensity from spent media with  
506 fresh media.

507

### 508 **Targeted short chain fatty acid (SCFA) measurement**

509

510 The 3-NPH method was used for the quantitation of SCFAs (55). Briefly, 40  $\mu$ L of the SM and  
511 15  $\mu$ L of isotopically labeled standards (ca 50  $\mu$ M) were mixed with 20  $\mu$ L 120 mM EDC HCl-  
512 6% pyridine-solution and 20  $\mu$ L of 200 mM 3-NPH HCL solution. After 30 min at 40°C and  
513 shaking at 1000 rpm using an Eppendorf Thermomix (Eppendorf, Hamburg, Germany), 900  
514  $\mu$ L acetonitrile/water (50/50, v/v) was added. After centrifugation at 13000 U/min for 2 min  
515 the clear supernatant was used for analysis. The same system as described above was used. The  
516 electrospray voltage was set to -4500 V, curtain gas to 35 psi, ion source gas 1 to 55, ion source  
517 gas 2 to 65 and the temperature to 500°C. The MRM-parameters were optimized using  
518 commercially available standards for the SCFAs. The chromatographic separation was  
519 performed on a 100  $\times$  2.1 mm, 100 Å, 1.7  $\mu$ m, Kinetex C18 column (Phenomenex,  
520 Aschaffenburg, Germany) column with 0.1% formic acid (eluent A) and 0.1% formic acid in  
521 acetonitrile (eluent B) as elution solvents. An injection volume of 1  $\mu$ L and a flow rate of 0.4  
522 mL/min was used. The gradient elution started at 23% B which was held for 3 min, afterward  
523 the concentration was increased to 30% B at 4 min, with another increase to 40%B at 6.5 min,  
524 at 7 min 100% B was used which was held for 1 min, at 8.5 min the column was equilibrated  
525 at starting conditions. The column oven was set to 40°C and the autosampler to 15°C. Data  
526 acquisition and instrumental control were performed with Analyst 1.7 software (Sciex,  
527 Darmstadt, Germany).

528

### 529 **Dynamic metabolic profiling of bacterial supernatants**

530 All chemicals were purchased from Sigma Aldrich at the highest purity available. 50  $\mu$ l of the  
531 supernatants were spiked with 100 nmol sodium pyruvate- $^{13}\text{C}_3$  and 250 nmol norvaline as

532 internal standards, afterwards the samples were dried under a gentle stream of nitrogen. For  
533 derivatization 100  $\mu$ l of a methoxyamine hydrochloride solution (10mg/1 ml pyridine) were  
534 added and the sample was shaken at 40°C for 90 min. Afterwards 100  $\mu$ l of MTBSTFA (N-  
535 (tert-butyl)dimethyl-silyl)-N-methyl-trifluoroacetamide containing 1% tert-butyl-dimethyl-  
536 silylchlorid) was added and the sample was heated at 70°C for 45 min. GC-MS-analysis was  
537 performed with a QP2010 Plus or Ultra gas chromatograph/mass spectrometer (Shimadzu)  
538 equipped with a fused silica capillary column (Equity TM-5; 30 m  $\times$  0.25 mm, 0.25 $\mu$ m film  
539 thickness; SUPELCO) and a quadrupole detector working with electron impact ionization at  
540 70 eV. An aliquot of the derivatized samples was injected in 1:5 split mode at an interface  
541 temperature of 260°C and a helium inlet pressure of 70 kPa. After sample injection, the column  
542 was first kept at 60°C for 3 min and then developed with a temperature gradient of 10°C min<sup>-1</sup>  
543 to a final temperature of 300°C. This temperature was held for further 3 min.

544 Pyruvate results were calculated relative to the pyruvate-<sup>13</sup>C<sub>3</sub> standard (R<sub>t</sub> 12.2 min), whereas  
545 all other metabolites were calculated relative to norvaline (R<sub>t</sub> 17.7 min).

546 For qualitative sugar analysis 50  $\mu$ l of the medium were dried under a gentle stream of nitrogen.  
547 For derivatization 100  $\mu$ l of a methoxyamine hydrochloride solution (10mg/1 ml pyridine) were  
548 added and the sample was shaken at 40°C for 90 min. Afterwards 100  $\mu$ l of MSTFA (N-methyl-  
549 N (trimethylsilyl)trifluoroacetamide containing 1% trimethylchlorosilane) was added and the  
550 sample was heated at 50°C for 45 min. GC-MS-analysis was performed as described above.  
551 Glucose, fructose, galactose, mannose and trehalose were confirmed with standard solutions.

## 552 **Spot assays**

553 Bacterial cultures and subcultures were grown for 24 hours each in 10ml AF medium at 37°C  
554 under anaerobic conditions without shaking. Monocultures were diluted to OD<sub>600nm</sub> 0.1 in fresh  
555 AF medium. To generate a dense bacterial lawn, monoculture inocula were diluted in LB soft  
556 agar to OD<sub>600nm</sub> 0.01 and poured on a AF medium agar plate. After drying all respective other  
557 bacteria were spotted onto the bacterial lawn in duplicates in a volume of 5  $\mu$ l with OD<sub>600nm</sub>  
558 0.1. Plates were incubated at 37°C for 24h under anaerobic conditions.

## 559 **Co-culture experiments**

560 Monoculture inocula were prepared from a previous culture and subculture and were diluted to  
561 OD<sub>600nm</sub> 0.1 in fresh AF medium. Following, pairwise co-cultures were generated by pooling  
562 diluted inocula in a 1:1 ratio. From each co-culture 150 $\mu$ l were set aside for pH measurements  
563 and determination of initial relative abundances (timepoint 0h). The remaining co-cultures  
564 were diluted 1:10 to OD<sub>600nm</sub> 0.01 and pipetted into a round bottom 96-well plate (Nunc).  
565 Growth measurements were performed as described above for 72 hours. Samples for qPCR  
566 analysis and pH measurements were taken every 24 hours and the co-cultures were serially  
567 diluted 1:100 into 150 $\mu$ l fresh AF medium in a new 96-well round bottom plate to allow  
568 communities to approach a steady state composition over ~25 bacterial generations.

## 569 **DNA extraction**

570 DNA extraction was performed in the 96-well format using the PureLink™ Pro 96 genomic  
571 DNA Kit (Invitrogen) following the corresponding lysis protocol for Gram positive bacterial  
572 cells using lysozyme and proteinase K.

## 573 **Quantitative PCR of bacterial 16S rRNA genes**

574 Quantitative PCR was performed as described previously (23). Strain-specific 16S rRNA  
575 primers and hydrolysis probes were used for amplification. Standard curves were determined  
576 using linearized plasmids containing the 16S rRNA gene sequence of the individual strains.

577 The standard specific efficiency was then used for absolute quantification of 16S rRNA gene  
578 copy numbers of individual strains.

### 579 **Determination of co-culture outcomes**

580 Quantitative 16S rRNA copy numbers from the measurement endpoint of three independent  
581 co-culture experiments were determined by qPCR. Co-culture outcomes (positive, neutral or  
582 negative) were determined by calculating the individual abundance ratio for each strain in co-  
583 culture relative to monoculture. Therefore, the strain specific absolute abundance at 72h in all  
584 pairwise co-cultures was divided by the strain specific absolute abundance at 72h in  
585 monoculture ( $r_{i,bm} = \frac{m_{i,co}(t72h)}{m_{i,mono}(t72h)}$ ) for every individual experiment. Following, the mean  
586 abundance ratio from all individual experiments (n=3 per strain combination) was calculated.  
587 Significance was determined using a two-sided t-test.

### 588 **Community experiments**

589 Monoculture inocula were prepared from a previous culture and subculture and were diluted to  
590 OD<sub>600nm</sub> 0.1 in fresh AF medium. Following, the community inoculum with equivalent ratios  
591 of all 12 strains was generated from this dilution. The inoculum was distributed to ten cell  
592 culture flasks, thereby diluting the inoculum 1:10 to 10ml fresh AF medium, resulting in a  
593 starting OD<sub>600nm</sub> 0.01. Cell culture flasks were incubated at 37°C without shaking under  
594 anaerobic conditions. Every 24h for 10 days samples were taken for qPCR analysis, OD  
595 measurement and pH measurement and cultures were diluted 1:100 in 10ml fresh-AF medium.

### 596 **Malate uptake measurements**

597 Uptake of <sup>14</sup>C-malate by *E. faecalis* KB1 was determined in principle as previously described  
598 (56). Briefly, *E. faecalis* was grown anaerobically in LB medium with 40 mM malate and  
599 harvested in mid-log phase. Cells were centrifuged, washed twice with 50 mM Tris-HCl buffer  
600 (pH 7.4) containing 10 mM MgCl<sub>2</sub> and resuspended in 50 mM Tris-maleate buffer (pH 7.2)  
601 containing 5 mM MgCl<sub>2</sub>, thereby adjusting the cell suspension to an OD<sub>600</sub> of 10. For transport  
602 assays, this cell suspension was diluted 1:10 with 50 mM Tris-maleate buffer (pH 7.2)  
603 containing 5 mM MgCl<sub>2</sub> and 1 % (w/v) peptone. Uptake of <sup>14</sup>C-malate (55 mCi.mmol<sup>-1</sup>  
604 [Biotrend]) was measured at a total substrate concentration of 10 μM at 18° C. At various time  
605 intervals, transport was terminated by the addition of stop buffer (100 mM potassium phosphate  
606 buffer, pH 6.0, 100 mM LiCl), followed by rapid filtration through membrane filters (MN gf-  
607 5 0.4 μm; Macherey-Nagel). The filters were dissolved in 5 ml of scintillation fluid (MP  
608 Biomedicals), and radioactivity was determined in a liquid scintillation analyzer  
609 (PerkinElmer). Total protein content of *E. faecalis* cells in relation to OD<sub>600</sub> was determined  
610 with a suspension of lysed cells as described before (57).

611

### 612 **Data analysis and Figures**

613 Data was analyzed using R Studio (Version 1.4.1103). Heatmaps were generated using the R  
614 *heatmap* package (<https://github.com/raivokolde/heatmap>). Plots were generated using the  
615 R *ggplot2* package (58) and *ggpubR* package (<https://github.com/kassambara/ggpubr>). Figures  
616 were partly generated using BioRender (<https://biorender.com>) and Adobe Illustrator CC  
617 (Adobe Inc.).

618

## 619 **Figure Legends**

### 620 **Figure 1: Growth analysis of OMM<sup>12</sup> strains in spent media experiments**

621 (A) Phylogenetic tree for bacteria of the OMM<sup>12</sup> consortium based on the individual 16S rRNA  
622 genes. The consortium represents the five major phyla of the murine gastrointestinal tract:  
623 Firmicutes (green), Bacteroidetes (orange), Verrucomicrobia (purple), Actinobacteria (blue)  
624 and Proteobacteria (red). (B) Flowchart depicting spent culture medium (SM) preparation by  
625 growing bacterial monocultures in fresh AF medium for 20h. Culture supernatants were sterile-  
626 filtered, samples for pH measurements and MS were collected, and the SM was used as culture  
627 medium for the growth of all respective other strains. After growth of the individual strains in  
628 the specific SM, pH of the double spent medium (DSM) was determined. Differences in pH  
629 were then analyzed by calculating the corresponding  $\Delta\text{pH}_{\text{SM}}$  and  $\Delta\text{pH}_{\text{DSM}}$ . (C) Monoculture  
630 growth in SM resulted in mostly decreased area under the growth curve (AUC) values in  
631 comparison to fresh AF medium, which was analyzed by calculating the inhibition factor  $d_{\text{AUC}}$ .  
632  $d_{\text{AUC}}$  was calculated from the mean AUC of three independent experiments relative to the mean  
633 AUC in fresh medium. (D) The mean pH of all SM (center of circles) and DSM (outer tiles)  
634 after growth of the individual strains in fresh medium and the respective SM was determined  
635 from three independent experiments. (E) Spot assays to determine production of antibacterial  
636 agents. All bacterial strains of the OMM<sup>12</sup> consortium were spotted onto a bacterial lawn of all  
637 the respective other strains. Inhibition zones were observed for *B. animalis* YL2, *F. plautii*  
638 YL31, *E. clostridioformis* YL32, *C. innocuum* I46 and *L. reuteri* I49 when *E. faecalis* KB1  
639 was spotted. No inhibition zone was seen for *E. faecalis* KB1 on itself. AF medium with *E.*  
640 *faecalis* KB1 spotted is shown as control.

641

### 642 **Figure 2: Overlap of substrate depletion profiles between individual OMM<sup>12</sup> strains**

643 (A) Depletion profiles of substrates after bacterial growth to stationary phase in AF medium  
644 were determined by untargeted MS from three independent experiments. All metabolomic  
645 features (rows) that significantly decreased ( $p < 0.05$  compared to fresh media) compared to  
646 fresh medium for at least one of the twelve strains are shown in red. Dark-red indicates strong  
647 depletion, while white indicates no depletion of the metabolomics feature. Hierarchical  
648 clustering of strain specific profiles as well as metabolomic features reveal profile similarities  
649 between phylogenetically similar strains. (B) Bar plot showing the total number of significantly  
650 ( $p < 0.05$  compared to fresh media) depleted metabolomic features in AF medium for the  
651 individual strains. (C) Pairwise overlap in depletion profiles in percent of the total number of  
652 individually depleted metabolomic features. (D) Euler diagram depicting total number of  
653 depleted metabolomic features and overlap within the consortium. Size of the ellipse denotes  
654 number of depleted features, size of overlap between ellipses denotes number of features that  
655 are shared when comparing the individual profiles.

656

### 657 **Figure 3: Metabolic potential of the OMM<sup>12</sup> strains**

658 (A) OMM<sup>12</sup> genomes were screened for a hand-curated set of key enzymes to determine the  
659 strains' potential to use a diverse range specific substrates, metabolic pathways and release  
660 fermentation end products. A potential substrate and pathway utilization was considered  
661 positive (green) if one of the associated KO's was found in the respective genome (**SI data**  
662 **table**). Consequently, positive hits do not indicate completeness of the pathway. If none of the  
663 associated KO's was found in the respective genome, the potential substrate and pathway  
664 utilization was considered negative (grey). Metabolites and pathways were sorted by functional

665 groups. **(B)** By combining metabolomics data (MS, **Fig. S10, S11**) with genome-based  
666 information on the presence of key enzymes, broad-scale draft metabolic models of the  
667 individual OMM<sup>12</sup> strains were generated (supplementary text C, **Fig. S12**). Here, the models  
668 for strains *E. faecalis* KB1, **(C)** *B. caecimuris* I48, **(D)** *B. coecoides* L58 and **(E)** *F. plautii*  
669 YL31 are shown. Models of remaining strains of the consortium are shown in **Fig. S12**.  
670 Experimentally confirmed substrates, products or enzymes are shown in black. Hypothetical  
671 substrates, products or enzymes are shown in grey.

672

#### 673 **Figure 4: Pairwise cultures of the OMM<sup>12</sup> strains**

674 **(A)** OMM<sup>12</sup> pairwise strain combinations (12 monocultures, 66 co-cultures) were cultured in a  
675 1:1 ratio in fresh AF medium over the course of 72 hours and growth, pH and relative  
676 abundance was monitored over time in three independent experiments. Growth at OD<sub>600nm</sub> and  
677 pH is shown as mean with the corresponding standard deviation (grey), relative abundance  
678 over time is shown exemplary for one of the three experiments. Examples of how growth curves  
679 develop with changing relative abundances is shown for the co-culture of *T. muris* YL45 and  
680 *L. reuteri* I49 **(B)**. Starting with a OD<sub>600nm</sub> ratio of approximately 1:1, final mean OD<sub>600nm</sub>  
681 values after the first two turnovers are low, corresponding to YL45 dominating the co-culture.  
682 After 48h, *L. reuteri* I49 resumes growth and final OD values increase. With *L. reuteri* I49  
683 dominating the community in the end, the growth curve as well resembles *L. reuteri* I49  
684 monoculture growth. Similarly, pH values reflect changes in co-culture structure, as can be  
685 observed e.g. in the co-culture of *C. innocuum* I46 and *B. coecoides* YL58 **(C)**. In monoculture,  
686 *C. innocuum* I46 does not strongly acidify its environment, while YL58 acidifies the culture  
687 supernatant to around pH 6.0. In accordance with this observation, pH values of the co-culture  
688 supernatant only drop with increasing dominance of YL58 in the co-culture.

689

#### 690 **Figure 5: Transferring pairwise interactions to the community level**

691 **(A)** By comparing the mean bacterial abundance from three independent experiments in co-  
692 culture to the mean abundance in monoculture, a pairwise interaction matrix was generated.  
693 Interactions where the individual abundance in co-culture significantly (t-test, p < 0.05)  
694 increased are indicated with (+), interactions where it significantly decreased are indicated with  
695 (-) and interaction where the abundance did not change in comparison to monoculture growth  
696 were indicated with (0). **(B)** Using a serial passaging batch culture setup, the OMM<sup>12</sup>  
697 community composition was analyzed after ten days of serial dilutions by comparing the  
698 relative strain abundances of ten replicates (F1-F10) with the inoculum. **(C)** To study the  
699 influence of *E. faecalis* KB1 on community composition, a OMM<sup>11</sup>-KB1 dropout community  
700 was constructed and relative abundance at day ten was analyzed for ten replicates (F1-F10).  
701 **(D)** Based on SM experiments, pairwise co-culture and community experiments a predation  
702 interaction mechanism between strains *C. innocuum* I46 and *E. faecalis* KB1 is proposed. We  
703 hypothesize, that KB1 produces a bacteriocin inhibiting I46, and benefits from cross-feeding  
704 on I46 derived metabolites. **(E)** Potentially cross-fed metabolites were determined by  
705 comparing SM profiles (determined by untargeted MS) of KB1 and I46 for metabolites that are  
706 strongly produced by I46 and consumed by KB1. Verified annotations are shown in green,  
707 potential annotations are shown in black and not annotated compounds are shown in grey as  
708 the corresponding feature identification numbers. **(F)** Time course of malate uptake by whole  
709 cells of *E. faecalis* KB1. Rates of <sup>14</sup>C-malate uptake were measured at a final malate  
710 concentration of 10 μM at 18° C. Standard deviations are estimated from three biological  
711 replicates.



## 712 **Acknowledgements**

713 The authors thank D. Ring, C. Beck and C. Schwarz for their technical support and members  
714 of the Stecher laboratory for helpful feedback and discussions. This research received funding  
715 by the German Research Foundation (DFG, German Research Foundation, Projektnummer  
716 395357507– SFB 1371, Projektnummer 279971426 and 315980449), the European Research  
717 Council (ERC) under the European Union’s Horizon 2020 research and innovation programm  
718 (Grant Agreement 865615), the German Center for Infection Research (DZIF) and the Center  
719 for Gastrointestinal Microbiome Research (CEGIMIR).

720

721

## 722 **Author contributions**

723 B.S., A.S., K.J. and A.S.W. conceived and designed the experiments. A.S.W., A.v.S., A.B.,  
724 A.C.D.R., L.R., S.G., K.K. and C.H. performed the experiments. A.S.W., A.B., A.C.D.R., L.R.,  
725 C.M. C.H., K.K., S.G. and P.M. analyzed the data. P.M., K.K., C.M., C.H., K.J. and W.E.  
726 contributed materials/ analysis tools. B.S. coordinated the project. B.S., L.M.J. and A.S.W.  
727 wrote the original draft and all authors reviewed and edited the draft manuscript.

728

## 729 **Competing interests**

730 The authors declare no competing financial interests.

731

## 732 **References**

733

- 734 1. Gilbert J, Blaser M, Caporaso J, Jansson J, Lynch S, Knight R. Current understanding  
735 of the human microbiome. *Nat Med*. 2018:<https://doi.org/10.1038/nm.4517>.
- 736 2. Forster S, Kumar N, Anonye B, Almeida A, Viciani E, Stares M, et al. A human gut  
737 bacterial genome and culture collection for improved metagenomic analyses. *Nat Biotechnol*.  
738 2019:<https://doi.org/10.1038/s41587-018-0009-7>.
- 739 3. Blasche S, Kim Y, Mars R, Kafkia E, Maansson M, Machado D, et al. Emergence of  
740 stable coexistence in a complex microbial community through metabolic cooperation and  
741 spatio-temporal niche partitioning. *preprint*. 2019:<https://doi.org/10.1101/541870>
- 742 4. Amor D, Ratzke C, Gore J. Transient invaders can induce shifts between alternative  
743 stable states of microbial communities. *Science Advances*.  
744 2020:<https://doi.org/10.1126/sciadv.aay8676>.
- 745 5. Faith J, Guruge J, Charbonneau M, Subramanian S, Seedorf H, Goodman A, et al. The  
746 long-term stability of the human gut microbiota. *Science*.  
747 2013:<https://doi.org/10.1126/science.1237439>.
- 748 6. Coyte K, Schluter J, Foster K. The ecology of the microbiome: Networks, competition,  
749 and stability. *Science*. 2015:<https://doi.org/10.1126/science.aad2602>.
- 750 7. Gralka M, Szabo R, Stocker R, Cordero O. Trophic Interactions and the Drivers of  
751 Microbial Community Assembly. *Current Biology*.  
752 2020:<https://doi.org/10.1016/j.cub.2020.08.007>.
- 753 8. Granato E, Meiller-Lagrang T, Foster K. The Evolution and Ecology of Bacterial  
754 Warfare. *Current Biology*. 2019:<https://doi.org/10.1016/j.cub.2019.04.024>.

- 755 9. Caballero S, Kim S, Carter R, Leiner I, Sušac B, Miller L, et al. Cooperating  
756 Commensals Restore Colonization Resistance to Vancomycin-Resistant *Enterococcus*  
757 *faecium*. *Cell Host Microbe*. 2017:<https://doi.org/10.1016/j.chom.2017.04.002>.
- 758 10. Gutiérrez N, Garrido D. Species Deletions from Microbiome Consortia Reveal Key  
759 Metabolic Interactions between Gut Microbes. *mSystems*.  
760 2019:<https://doi.org/10.1128/mSystems.00185-19>.
- 761 11. Ratzke C, Barrere J, Gore J. Strength of species interactions determines biodiversity  
762 and stability in microbial communities. *Nat Ecol Evol*. 2020:[https://doi.org/10.1038/s41559-](https://doi.org/10.1038/s41559-020-1099-4)  
763 [020-1099-4](https://doi.org/10.1038/s41559-020-1099-4).
- 764 12. Kim S, Covington A, Pamer E. The intestinal microbiota: Antibiotics, colonization  
765 resistance, and enteric pathogens. *Immunological reviews*.  
766 2017:<https://doi.org/10.1111/imr.12563>.
- 767 13. Kreuzer M, Hardt W. Affects Colonization Resistance Against Enteropathogenic  
768 Bacteria. *Annual review of microbiology*. 2020:[https://doi.org/10.1146/annurev-micro-](https://doi.org/10.1146/annurev-micro-020420-13457)  
769 [020420-13457](https://doi.org/10.1146/annurev-micro-020420-13457).
- 770 14. Lloyd-Price J, Arze C, Ananthakrishnan A, ..., Huttenhower C. Multi-omics of the gut  
771 microbial ecosystem in inflammatory bowel diseases. *Nature*.  
772 2019:<https://doi.org/10.1038/s41586-019-1237-9>.
- 773 15. Pereira F, Wasmund K, Cobankovic I, Jehmlich N, Herbold C, Lee K, et al. Rational  
774 design of a microbial consortium of mucosal sugar utilizers reduces *Clostridiodes* *difficile*  
775 colonization. 2020;Nature Communications:<https://doi.org/10.1038/s41467-020-18928-1>.
- 776 16. Freilich S, Kreimer A, Meilijson I, Gophna U, Sharan R, Ruppin E. The large-scale  
777 organization of the bacterial network of ecological co-occurrence interactions. *Nucleic Acid*  
778 *Research*. 2010:<https://doi.org/10.1093/nar/gkq118>.
- 779 17. Shoaie S, Karlsson F, Mardinoglu A, Nookaew I, Bordel S, Nielsen J. Understanding  
780 the interactions between bacteria in the human gut through metabolic modeling. *Scientific*  
781 *reports*. 2013:<https://doi.org/10.1038/srep02532>.
- 782 18. Shoaie S, Ghaffari P, Kovatcheva-Datchary P, Mardinoglu A, Sen P, Pujos-Guillot E,  
783 et al. Quantifying Diet-Induced Metabolic Changes of the Human Gut Microbiome. *Cell*  
784 *metabolism*. 2015:<https://doi.org/10.1016/j.cmet.2015.07.001>.
- 785 19. Biggs M, Medlock G, Moutinho T, Lees H, Swann J, Kolling G, et al. Systems-level  
786 metabolism of the altered Schaedler flora, a complete gut microbiota. *ISME*.  
787 2017:<https://doi.org/10.1038/ismej.2016.130>.
- 788 20. Medlock G, Carey M, McDuffie D, Mundy M, Giallourou N, Swann J, et al. Inferring  
789 Metabolic Mechanisms of Interaction within a Defined Gut Microbiota. *Cell Systems*.  
790 2018:<https://doi.org/10.1016/j.cels.2018.08.003>.
- 791 21. Venturelli O, Carr A, Fisher G, Hsu R, Lau R, Bowen B, et al. Deciphering microbial  
792 interactions in synthetic human gut microbiome communities. *Mol Syst Biol*.  
793 2018:<https://doi.org/10.15252/msb.20178157>.
- 794 22. Clark R, Connors B, Stevenson D, Hromada S, Hamilton J, Amador-Noguez D, et al.  
795 Design of synthetic human gut microbiome assembly and function. *bioRxiv*.  
796 2020:<https://doi.org/10.1101/2020.08.19.241315>.
- 797 23. Brugiroux S, Beutler M, Pfann C, Garzetti D, Ruscheweyh H, Ring D, et al. Genome-  
798 guided design of a defined mouse microbiota that confers colonization resistance against  
799 *Salmonella enterica* serovar Typhimurium. *Nat Microbiol*.  
800 2016:<https://doi.org/10.1038/nmicrobiol.2016.215>.
- 801 24. Studer N, Desharnais L, Beutler M, Brugiroux S, Terrazos M, Menin L, et al. Functional  
802 Intestinal Bile Acid 7 $\alpha$ -Dehydroxylation by *Clostridium scindens* Associated with Protection  
803 from *Clostridium difficile* Infection in a Gnotobiotic Mouse Model. *Frontiers in cellular and*  
804 *infection microbiology*. 2016:<https://doi.org/10.3389/fcimb.2016.00191>.

- 805 25. Herp S, Brugiroux S, Garzetti D, Ring D, Jochum L, Beutler M, et al. Mucispirillum  
806 schaedleri Antagonizes Salmonella Virulence to Protect Mice against Colitis. *Cell Host*  
807 *Microbe*. 2019:<https://doi.org/10.1016/j.chom.2019.03.004>.
- 808 26. Eberl C, Ring D, Münch P, Beutler M, Basic M, Slack E, et al. Reproducible  
809 Colonization of Germ-Free Mice With the Oligo-Mouse-Microbiota in Different Animal  
810 Facilities. *Front Microbiol*. 2020:<https://doi.org/10.3389/fmicb.2019.02999>.
- 811 27. Garzetti D, Brugiroux S, Bunk B, Pukall R, McCoy K, Macpherson A, et al. High-  
812 Quality Whole-Genome Sequences of the Oligo-Mouse-Microbiota Bacterial Community.  
813 *Genome announcements*. 2017:<https://doi.org/10.1128/genomeA.00758-17>.
- 814 28. Lagkouvardos I, Pukall R, Abt B, Foesel B, Stecher B, Clavel T. The Mouse Intestinal  
815 Bacterial Collection (miBC) provides host-specific insight into cultured diversity and  
816 functional potential of the gut microbiota. *Nat Microbiol*.  
817 2016:<https://doi.org/10.1038/nmicrobiol.2016.131>.
- 818 29. Bolsega S, Basic M, Smoczek A, Buettner M, Eberl C, Ahrens D, et al. Composition  
819 of the Intestinal Microbiota Determines the Outcome of Virus-Triggered Colitis in Mice.  
820 *Frontiers in immunology*. 2019:<https://doi.org/10.3389/fimmu.2019.01708>.
- 821 30. Kuczma M, Szurek E, Cebula A, Chassaing B, Jung Y, Kang S, et al. Commensal  
822 epitopes drive differentiation of colonic Tregs. *Science advances*.  
823 2020:<https://doi.org/10.1126/sciadv.aaz3186>.
- 824 31. Nowosad C, Mesin L, Castro T, Wichmann C, Donaldson G, Araki T, et al. Tunable  
825 dynamics of B cell selection in gut germinal centres. *Nature*.  
826 2020:<https://doi.org/10.1038/s41586-020-2865-9>.
- 827 32. Marion S, Desharnais L, Studer N, Dong Y, Notter M, Poudel S, et al. Biogeography  
828 of microbial bile acid transformations along the murine gut. *Journal of lipid research*.  
829 2020:<https://doi.org/10.1194/jlr.RA120001021>.
- 830 33. Cintas L, Casaus P, Holo H, Hernandez P, Nes I, Håvarstein L. Enterocins L50A and  
831 L50B, two novel bacteriocins from Enterococcus faecium L50, are related to staphylococcal  
832 hemolysins. *J Bacteriol*. 1998:<https://doi.org/10.1128/JB.180.8.988-994.998>.
- 833 34. Blin K, Shaw S, Steinke K, Villebro R, Ziemert N, Lee S, et al. antiSMASH 5.0: updates  
834 to the secondary metabolite genome mining pipeline. *Nucleic Acids Research*.  
835 2019:<https://doi.org/10.1093/nar/gkz310>.
- 836 35. Berry D, Widder S. Deciphering microbial interactions and detecting keystone species  
837 with co-occurrence networks. *Front Microbiol*. 2014;5:219.
- 838 36. Goberna M, Verdu M. Predicting microbial traits with phylogenies. *ISME Journal*.  
839 2016: <https://doi.org/10.1038/ismej.2015.171>.
- 840 37. Langille M, Zaneveld J, Caporaso J, McDonald D, Knights D, Reyes J, et al. Predictive  
841 functional profiling of microbial communities using 16S rRNA marker gene sequences. *Nature*  
842 *biotechnology*. 2013:<https://doi.org/10.1038/nbt.2676>.
- 843 38. Cotter P, Ross R, Hill C. Bacteriocins - a viable alternative to antibiotics. *Nature*  
844 *reviews Microbiology*. 2013:<https://doi.org/10.1038/nrmicro2937>.
- 845 39. Ubeda C, Taur Y, Jenq R, Equinda M, Son T, Samstein M, et al. Vancomycin-resistant  
846 Enterococcus domination of intestinal microbiota is enabled by antibiotic treatment in mice  
847 and precedes bloodstream invasion in humans. *The Journal of clinical investigation*.  
848 2020:<https://doi.org/10.1172/JCI43918>.
- 849 40. Mortera P, Espariz M, Suárez C, Repizo G, Deutscher J, Alarcón S, et al. Fine-tuned  
850 transcriptional regulation of malate operons in Enterococcus faecalis. *Applied and*  
851 *environmental microbiology*. 2012:<https://doi.org/10.1128/AEM.07280-11>.
- 852 41. Estrela S, Sanchez-Gorostiaga A, Vila J, Sanchez A. Nutrient dominance governs the  
853 assembly of microbial communities in mixed nutrient environments. *preprint*.  
854 2020:<https://doi.org/10.1101/2020.08.06.239897>.

- 855 42. Berry D, Stecher B, Schintlmeister A, Reichert J, Brugiroux S, Wild B, et al. Host-  
856 compound foraging by intestinal microbiota revealed by single-cell stable isotope probing.  
857 *Proc Natl Acad Sci U S A*. 2013:<https://doi.org/10.1073/pnas.1219247110>.
- 858 43. Ottman N, Davids M, Suarez-Diez M, Boeren S, Schaap P, Martins Dos Santos V, et  
859 al. Genome-Scale Model and Omics Analysis of Metabolic Capacities of *Akkermansia*  
860 *muciniphila* Reveal a Preferential Mucin-Degrading Lifestyle. *Appl Environ Microbiol*.  
861 2017:<https://doi.org/10.1128/AEM.01014-17>.
- 862 44. Seeman T. Prokka: rapid prokaryotic genome annotation. *Bioinformatics*.  
863 2014:<https://doi.org/10.1093/bioinformatics/btu153>.
- 864 45. Pruesse E, Peplies J, Gloeckner F. SINA: Accurate high-throughput multiple sequence  
865 alignment of ribosomal RNA genes. *Bioinformatics*.  
866 2012:<https://doi.org/10.1093/bioinformatics/bts252>.
- 867 46. Stamatakis A. RAxML version 8: a tool for phylogenetic analysis and post-analysis of  
868 large phylogenies *Bioinformatics*. 2014:<https://doi.org/10.1093/bioinformatics/btu033>.
- 869 47. Revell L. phytools: an R package for phylogenetic comparative biology (and other  
870 things). *Methods in Ecology and Evolution*. 2012:[https://doi.org/10.1111/j.2041-](https://doi.org/10.1111/j.2041-210X.11.00169.x)  
871 [210X.11.00169.x](https://doi.org/10.1111/j.2041-210X.11.00169.x).
- 872 48. Letunic I, Bork P. Interactive Tree Of Life (iTOL): an online tool for phylogenetic tree  
873 display and annotation. *Bioinformatics*. 2007:<https://doi.org/10.1093/bioinformatics/bt1529>.
- 874 49. Hyatt D, Chen G, Locascio P, Land M, Larimer F, Hauser L. Prodigal: prokaryotic gene  
875 recognition and translation initiation site identification. *BMC bioinformatics*.  
876 2010:<https://doi.org/10.1186/471-2105-11-119>.
- 877 50. Aramaki T, Blanc-Mathieu R, Endo H, Ohkubo K, Kanehisa M, Goto S, et al.  
878 KofamKOALA: KEGG Ortholog assignment based on profile HMM and adaptive score  
879 threshold. *Bioinformatics*. 2020:<https://doi.org/10.1093/bioinformatics/btz859>.
- 880 51. Kessner D, Chambers M, Burke R, Agus D, Mallick P. ProteoWizard: open source  
881 software for rapid proteomics tools development. *Bioinformatics*.  
882 2008:<https://doi.org/10.1093/bioinformatics/btn323>.
- 883 52. Smith C, Want E, O'Maille G, Abagyan R, Siuzdak G. XCMS: processing mass  
884 spectrometry data for metabolite profiling using nonlinear peak alignment, matching, and  
885 identification. *Analytical chemistry*. 2006:<https://doi.org/10.1021/ac051437y>.
- 886 53. Wishart D, Feunang Y, Marcu A, Guo A, Liang K, ..., et al. HMDB 4.0: the human  
887 metabolome database for 2018. *Nucleic acids research*.  
888 2018:<https://doi.org/10.1093/nar/gkx89>.
- 889 54. Tsugawa H, Cajka T, Kind T, Ma Y, Higgins B, Ikeda K, et al. MS-DIAL: data-  
890 independent MS/MS deconvolution for comprehensive metabolome analysis. *Nature methods*.  
891 2015:<https://doi.org/10.1038/nmeth.3393>.
- 892 55. Han J, Lin K, Sequeira C, Borchers CH. An isotope-labeled chemical derivatization  
893 method for the quantitation of short-chain fatty acids in human feces by liquid  
894 chromatography–tandem mass spectrometry. *Analytica Chimica Acta*. 2015;854:86-94.
- 895 56. Mokhtari A, Blancato VS, Repizo GD, Henry C, Pikiš A, Bourand A, et al.  
896 *Enterococcus faecalis* utilizes maltose by connecting two incompatible metabolic routes via a  
897 novel maltose 6'-phosphate phosphatase (MapP). *Mol Microbiol*. 2013;88(2):234-53.
- 898 57. Bradford MM. A rapid and sensitive method for the quantitation of microgram  
899 quantities of protein utilizing the principle of protein-dye binding. *Anal Biochem*. 1976;72:248-  
900 54.
- 901 58. Wickham H. ggplot2: Elegant graphics for data analysis. *Springer, New York*.  
902 2016:<https://ggplot2.tidyverse.org>.
- 903

# Figure 1

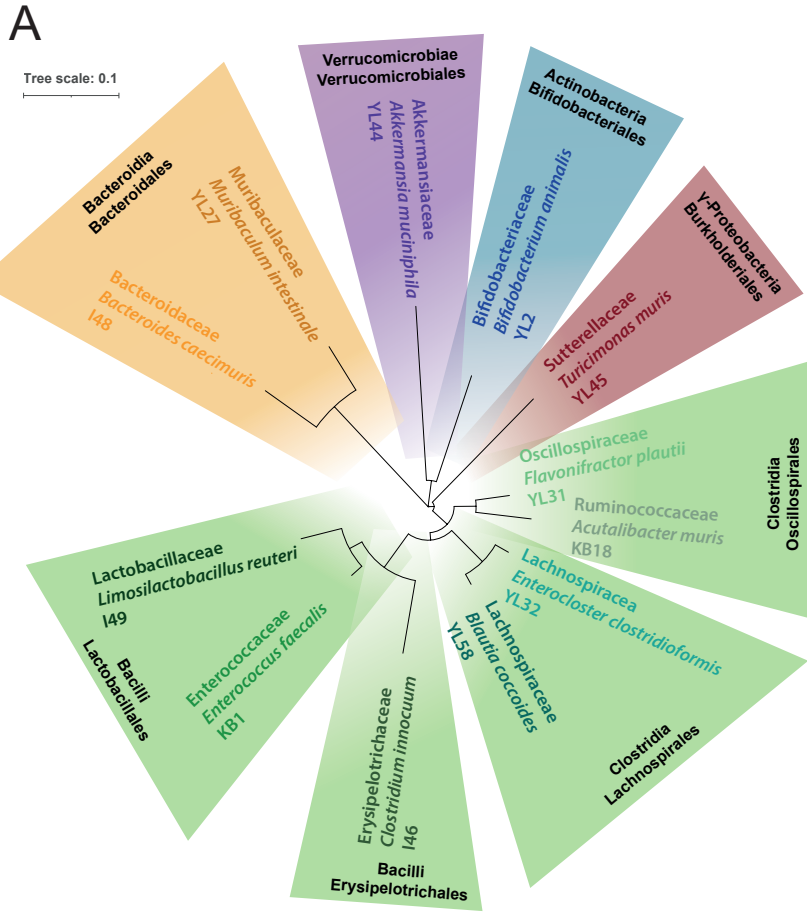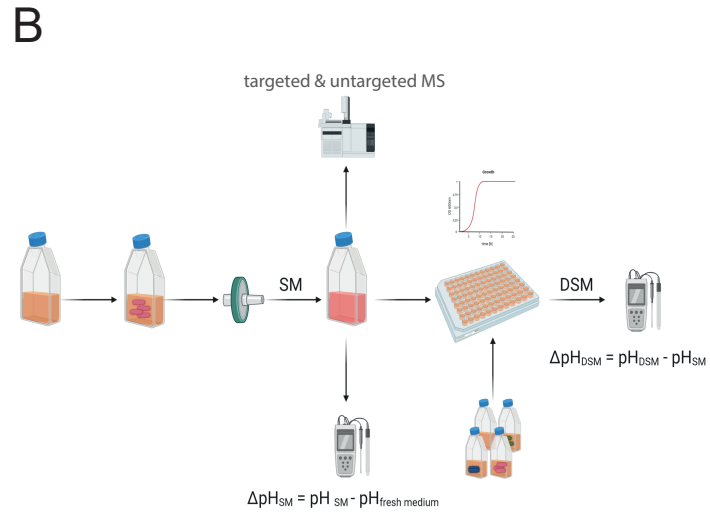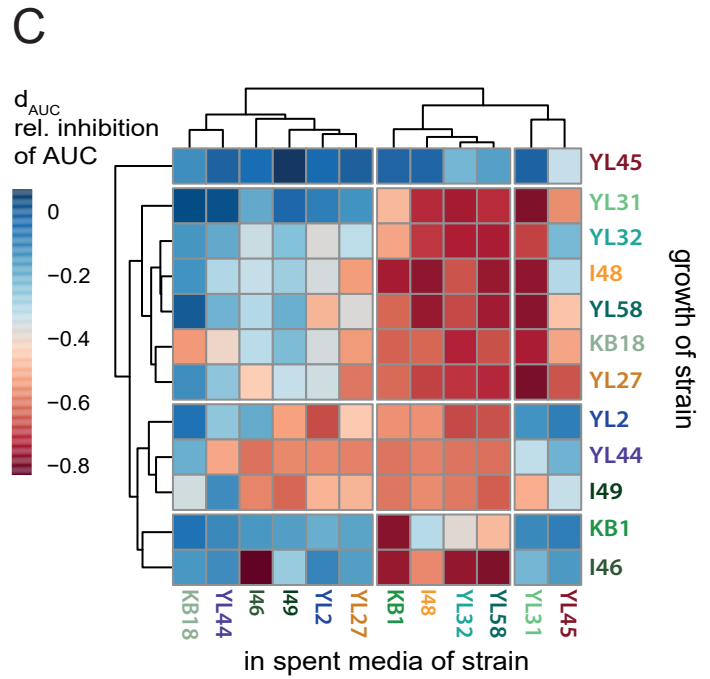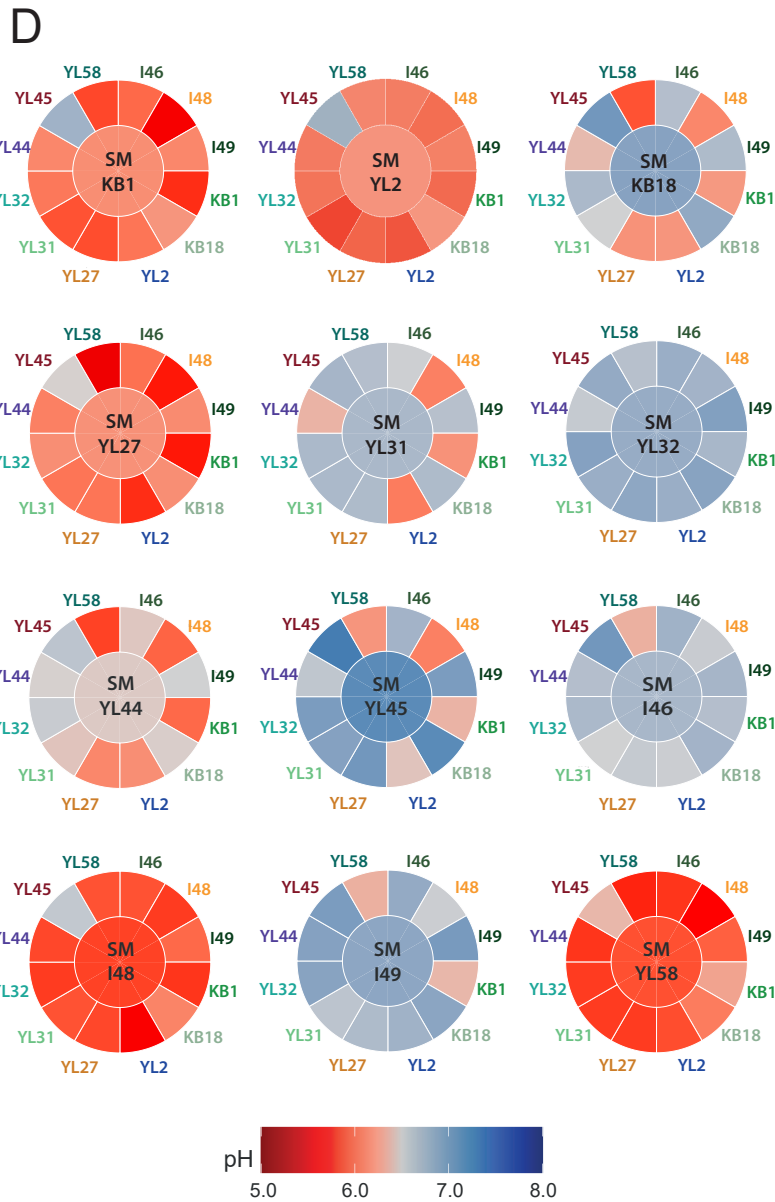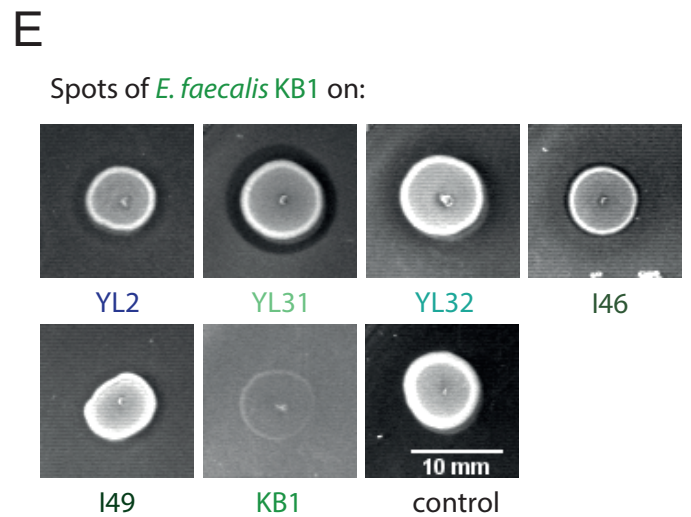

## Figure 2

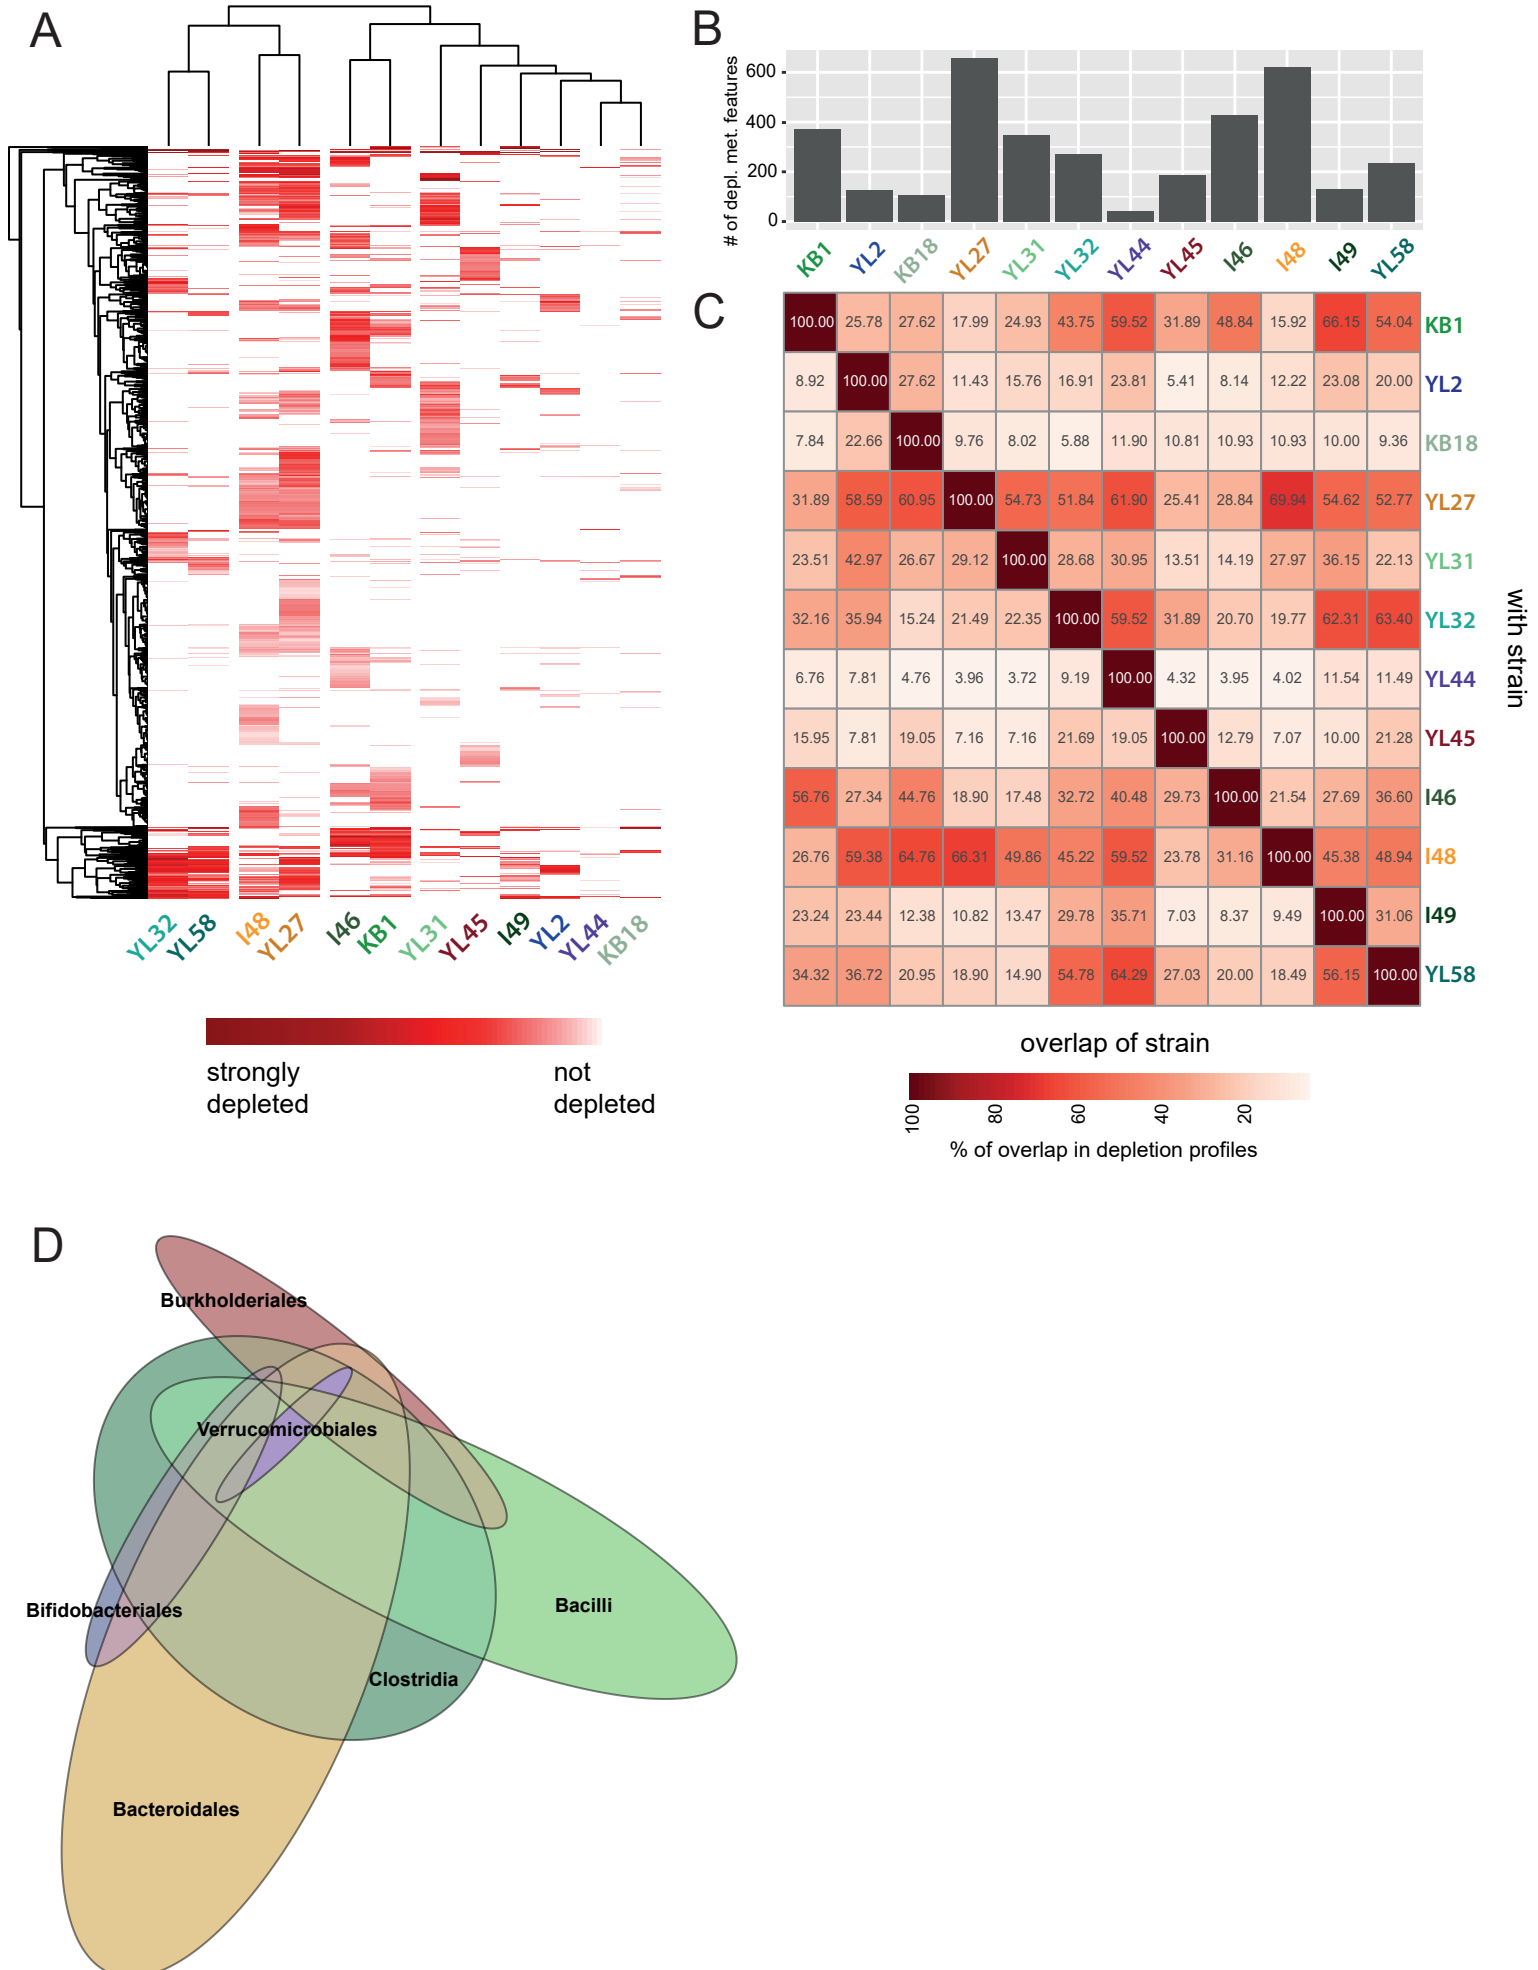

# Figure 3

A

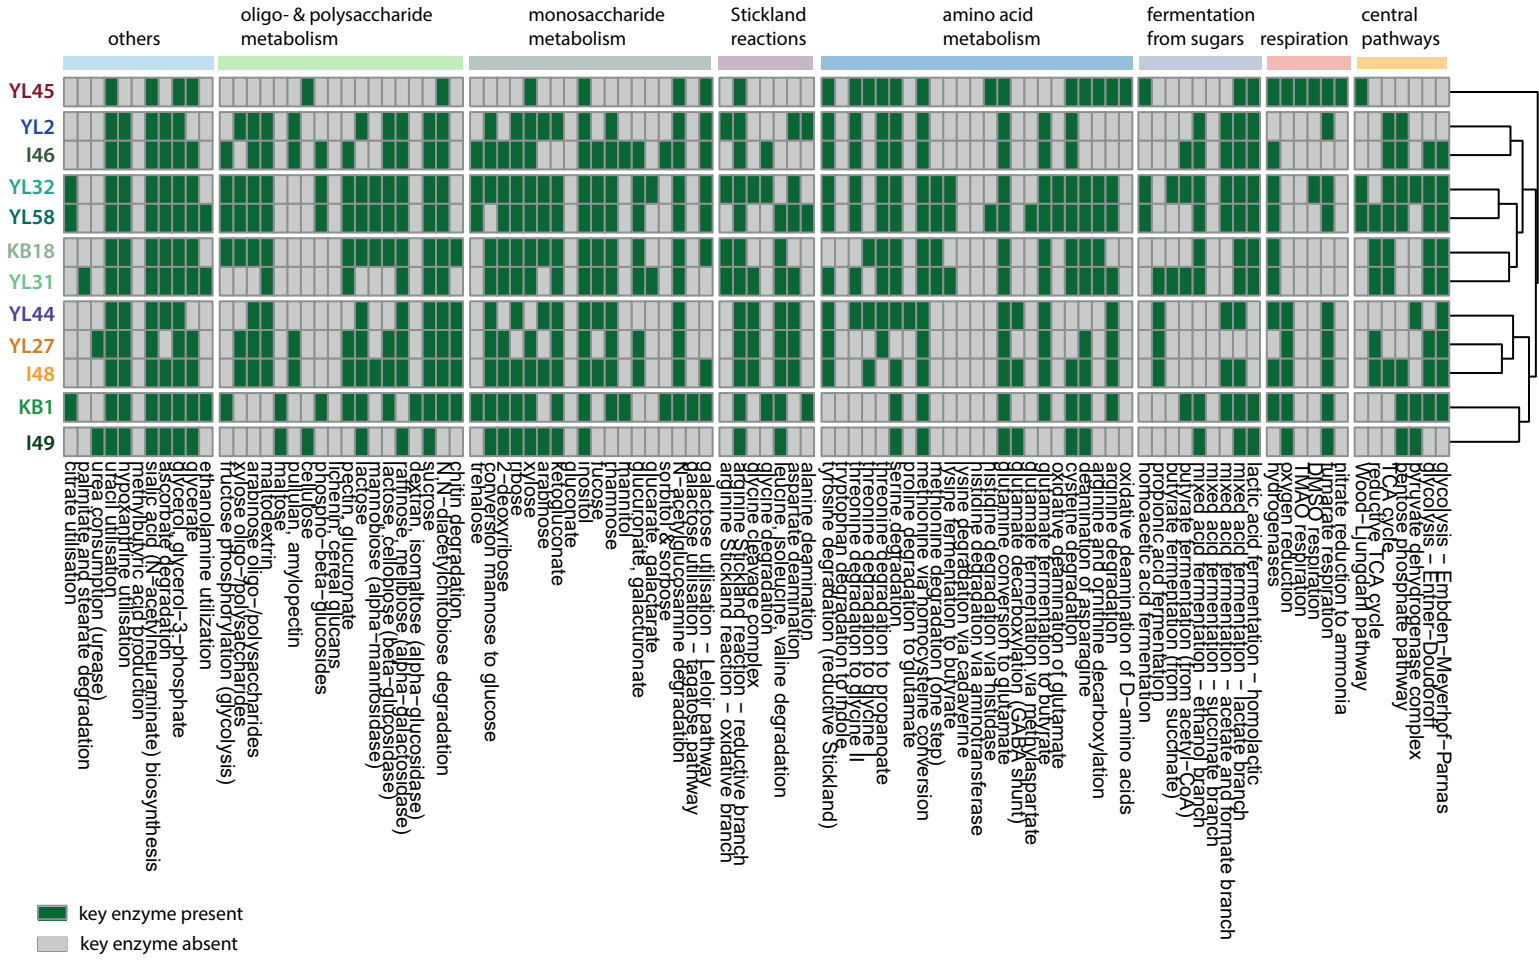

B

## *Enterococcus faecalis* KB1

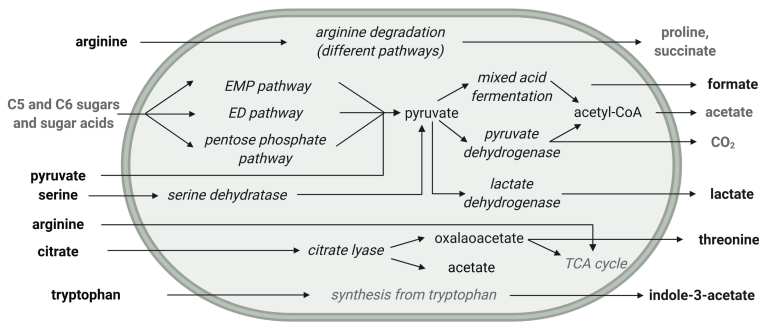

C

## *Bacteroides caecimuris* I48

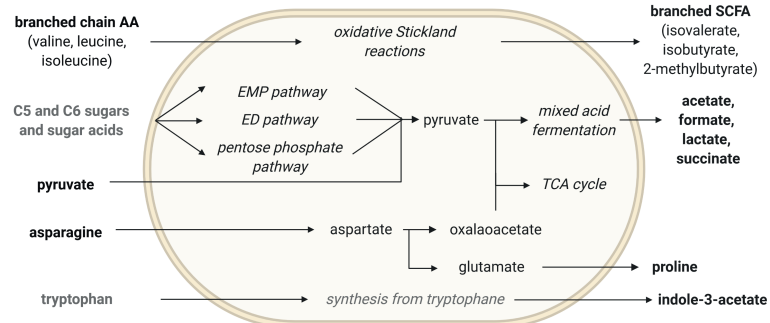

D

## *Blautia coccoides* YL58

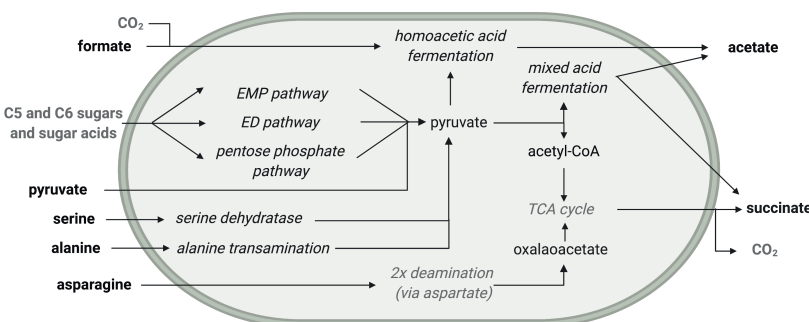

E

## *Flavonifractor plautii* YL31

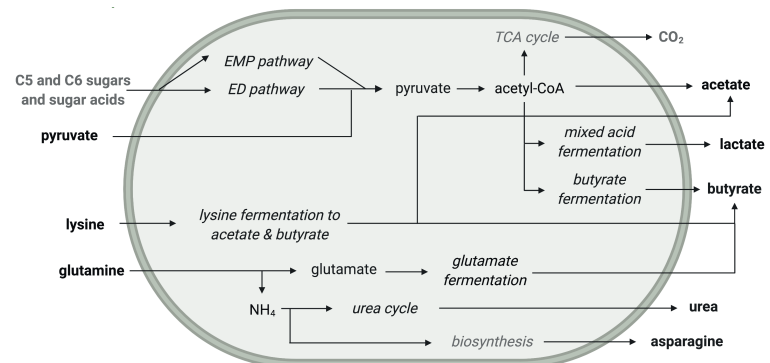

# Figure 4

## A

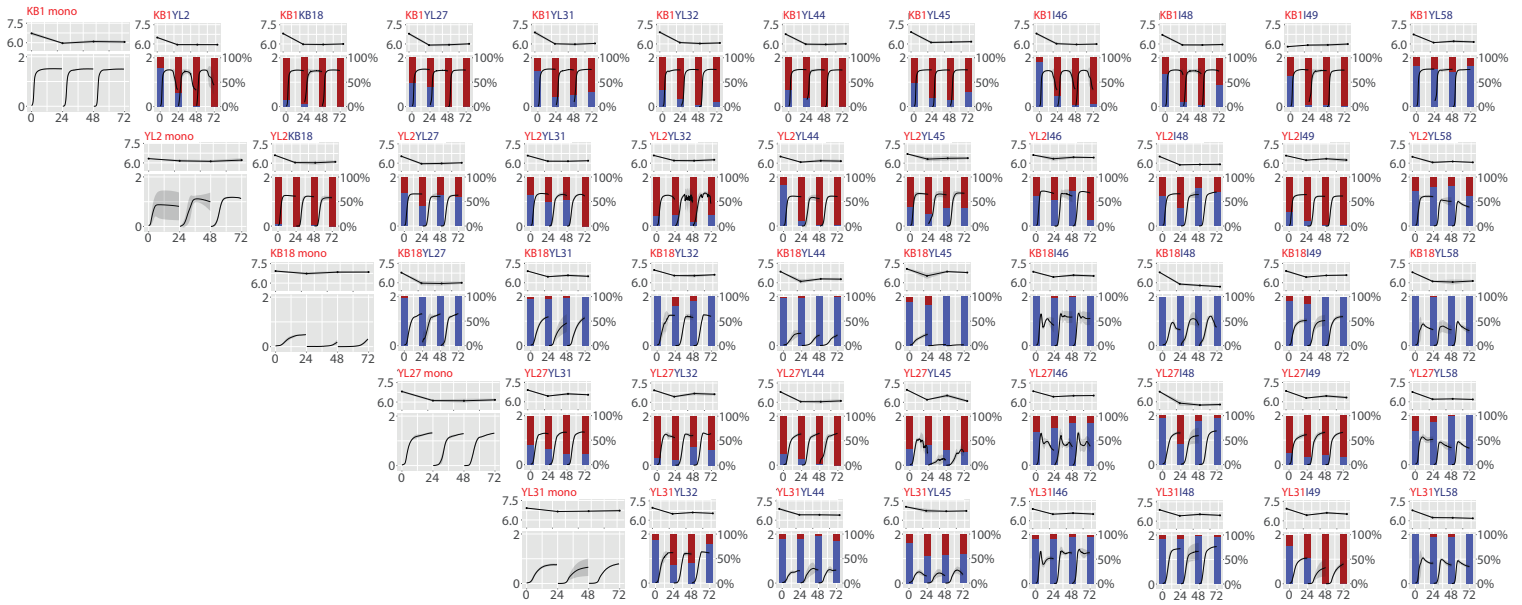

## B

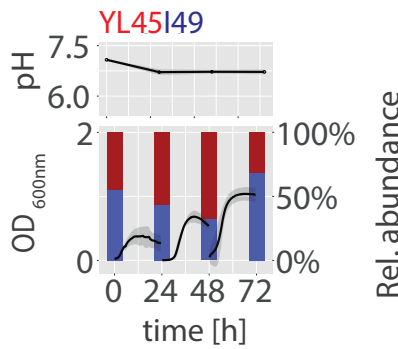

## C

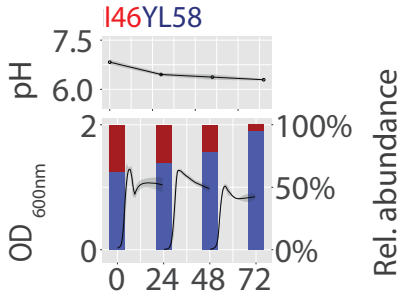



Figure 5

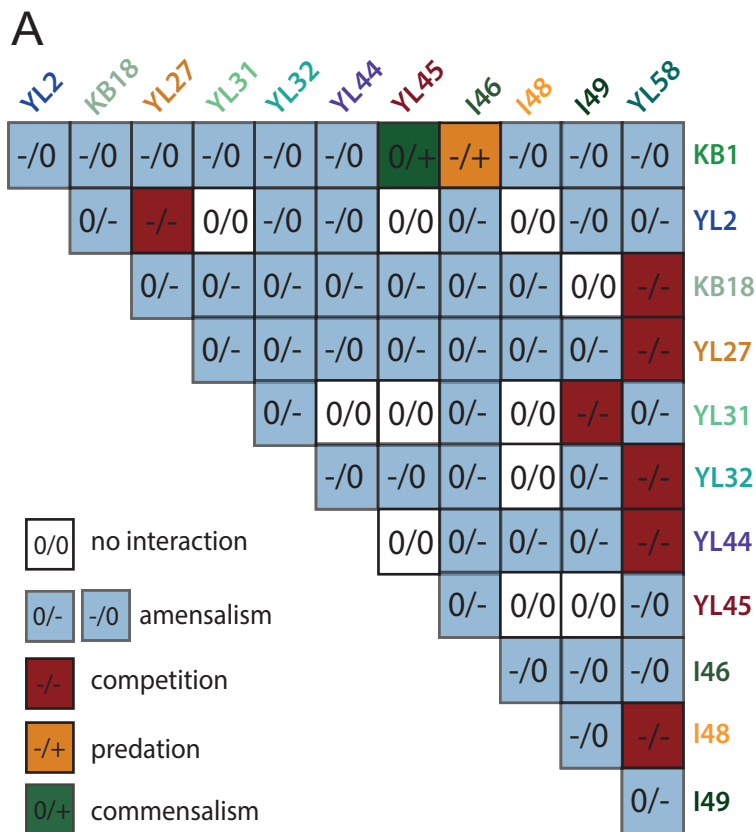

**D** Hypothesised interaction mechanism:

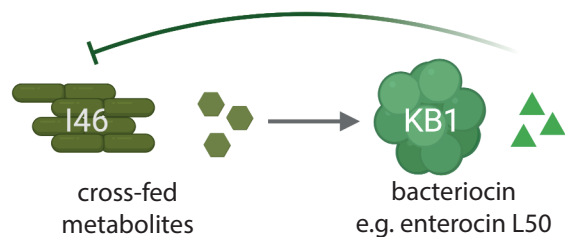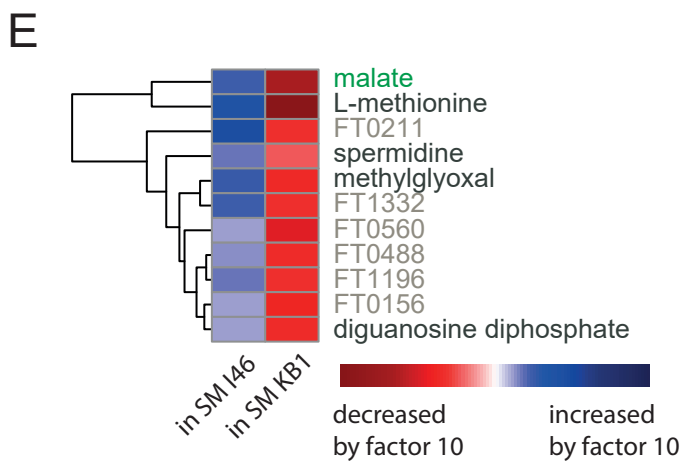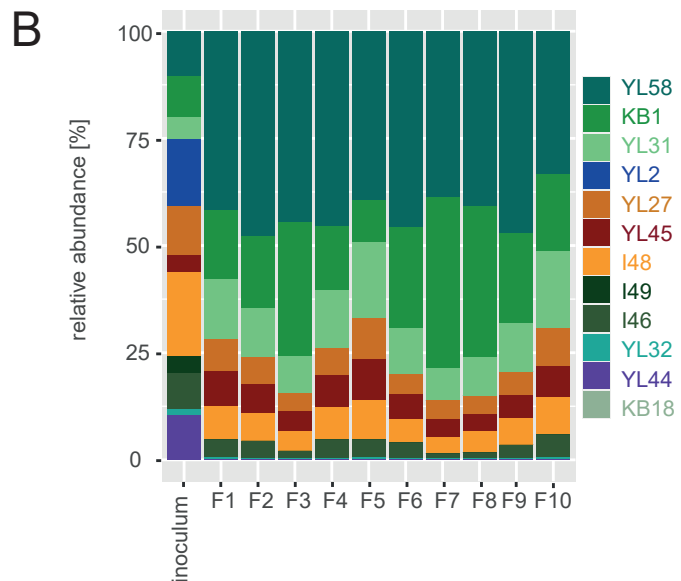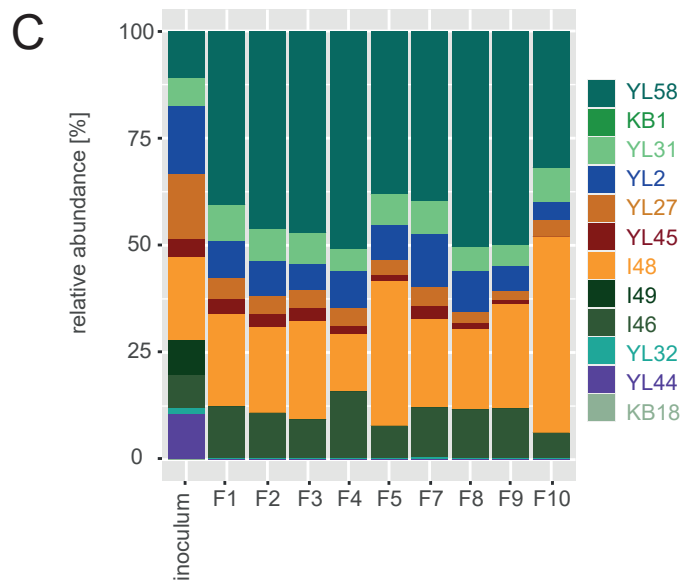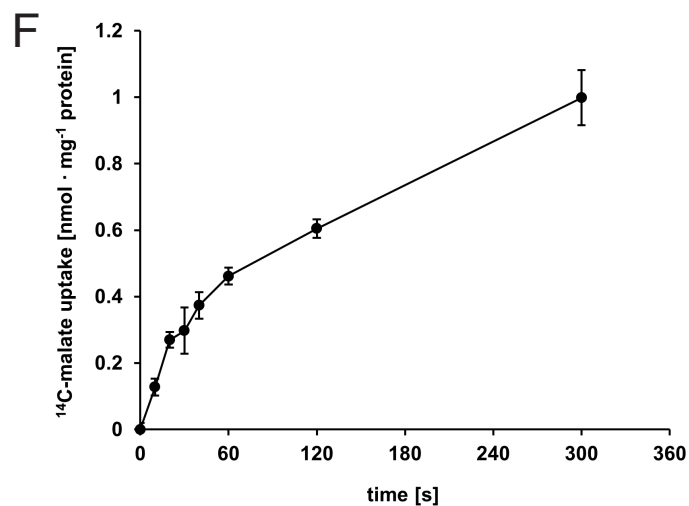

Source: https://www.biorxiv.org/content/biorxiv/early/2021/02/25/2021.02.25.432904.full.pdf
